# Supplementary material for: CMV: visualization for RNA and protein family models and their comparisons
Source: Oxford University Press journal article supplement (doi:10.1093/bioinformatics/bty158), 2018-03-15
Supplement: bioinformatics_34_15_2676_s1.pdf [file bioinformatics_34_15_2676_s1.pdf]

# CMV - Supplement and User Guide

Florian Eggenhofer<sup>1,2</sup>, Ivo L. Hofacker<sup>1,3</sup>, Rolf Backofen<sup>1,6</sup>, Christian Höner zu Siederdisen<sup>4,1,5</sup>

<sup>1</sup> Bioinformatics Group, Department of Computer Science University of Freiburg,  
Georges-Köhler-Allee ,79110 Freiburg, Germany

<sup>2</sup> Institute for Theoretical Chemistry, University of Vienna, Währingerstrasse  
17,A-1090 Vienna, Austria

<sup>3</sup> Bioinformatics and Computational Biology research group, University of Vienna,  
Währingerstrasse 17, A-1090 Vienna, Austria

<sup>4</sup> Bioinformatics Group, Department of Computer Science, University of Leipzig,  
D-04107 Leipzig

<sup>5</sup> Interdisciplinary Center for Bioinformatics, University of Leipzig, Härtelstraße  
16-18, D-04107 Leipzig, Germany

<sup>6</sup> Centre for Biological Signalling Studies (BIOSS), University of Freiburg, 79110  
Freiburg, Germany.

# Table of Contents

|                                                                                           |    |
|-------------------------------------------------------------------------------------------|----|
| CMV - Supplement and User Guide .....                                                     | 1  |
| <i>Florian Eggenhofer, Ivo L. Hofacker, Rolf Backofen, Christian Höner zu Siederdisen</i> |    |
| A Introduction .....                                                                      | 3  |
| B Installation .....                                                                      | 3  |
| B.1 Source availability .....                                                             | 3  |
| B.2 Usage via biocontainer - <i>macOS</i> .....                                           | 4  |
| B.3 Installation via bioconda - <i>Linux</i> .....                                        | 4  |
| B.4 Installation via cabal-install .....                                                  | 4  |
| B.5 Precompiled Executables .....                                                         | 4  |
| C HMM-Tools .....                                                                         | 4  |
| C.1 Program flowcharts .....                                                              | 5  |
| C.2 Input .....                                                                           | 5  |
| C.3 Commandline usage .....                                                               | 8  |
| C.4 Output .....                                                                          | 8  |
| HMMV output .....                                                                         | 8  |
| HMMCV output .....                                                                        | 8  |
| C.5 Examples .....                                                                        | 9  |
| D CM-Tools .....                                                                          | 9  |
| D.1 Program flowcharts .....                                                              | 10 |
| D.2 Input .....                                                                           | 10 |
| D.3 Commandline usage .....                                                               | 12 |
| D.4 Output .....                                                                          | 12 |
| CMV output .....                                                                          | 12 |
| Secondary structure visualisation .....                                                   | 12 |
| CMCV output .....                                                                         | 13 |
| Secondary structure visualisation .....                                                   | 13 |
| D.5 Examples .....                                                                        | 13 |
| D.6 Benchmark .....                                                                       | 13 |
| E Auxiliary tools .....                                                                   | 16 |
| E.1 CMCtoHMMC .....                                                                       | 16 |
| E.2 HMMCtoCMC .....                                                                       | 16 |

## A Introduction

CMV offers tools for the visualisation of *RNA* family models, also known as covariance models (*CM*) and Hidden Markov Models (*HMM*). Moreover, comparisons between models, the multiple sequence alignments they were constructed from and, in the case of *RNA* families, the consensus secondary structure can be visualised. The aim is to simplify model construction and evaluation by providing visualisations with different levels of detail. Minimal and simple detail representations give an overview over the size of the model by showing all nodes and in case of covariance models depict the guide tree, meaning nestedness of the secondary structure elements, of the model. Detailed views show nodes, states, emission as well as transition probabilities. Comparison results are highlighted by color labels which are consistently applied to model, alignment and secondary structure visualisation, allowing to inspect found similarities between models in their context. The tools can be applied to already existing *HMM*s (in *HMMER* [1] format) and *CM*s (in *Infernal* [2,3] format) from the *Pfam* [4,5] and *Rfam* database [6], as well as newly constructed models from *RNAlien* [7]. Comparisons between covariance models can be computed via *CMCompare* [8] and its webservice [9]. The first section describes installation and how to obtain the source code, see also the Tool subpage of the webservice. The second part of the guide explains the application of the tools for hidden markov models *HMMV* (Hidden markov model visualisation tool) and their comparisons *HMMCV* (Hidden markov model comparison visualisation tool) on the command line, as well as on the web service. The third part addresses the usage of the tools for covariance models *CMV* (Covariance model visualisation) and their comparisons *CMCV* (Covariance model comparison visualisation). For each of these tools an example is depicted in this guide, which is also available as single click-example submission on the webservice, complete with input files. The fourth part introduces the two auxiliary tools, *CMCtoHMM* mapping *CMCompare* output on *HMM*s and *HMMCtoCM* mapping *HMMCompare* output on *CM*s. This document is included with the tool as `manual.pdf` and as a variant serves as Help section of the webservice.

## B Installation

The visualisation tools are available as a commandline tool and as a webservice. For *Linux* we recommend installation via *bioconda*, for *macOS* usage of the *docker* container. The example input files used in the webservice (*EGF*, *Piwi*, *Hammerhead Clan*, *tRNA Clan*) can be retrieved here: [Example input](#)

### B.1 Source availability

The source code is open source and available via *GitHub* and *Hackage* both licenced with *GPL-3*.

## B.2 Usage via biocontainer - *macOS*

CMV can be retrieved and used as docker container with all dependencies via docker. Once you have docker installed simply type:

```
docker run -i -t quay.io/biocontainers/cmvs:1.0.7--0 /bin/bash
```

## B.3 Installation via bioconda - *Linux*

The package can be installed via conda. Once you have conda installed simply type:

```
conda install -c bioconda -c conda-forge cmv
```

## B.4 Installation via cabal-install

The package is implemented in Haskell and can be installed via the Haskell package distribution system cabal. Once you have cabal installed simply type:

```
cabal install CMV
```

## B.5 Precompiled Executables

Linux x86\_64: HMMV

Linux x86\_64: HMMCV

Linux x86\_64: CMV

Linux x86\_64: CMCV

Auxiliary tools:

Linux x86\_64: CMCtoHMMC

Linux x86\_64: HMMCtoCMC

## C HMM-Tools

Hidden Markov models are used to represent the sequence information of biopolymers. Nodes of the model represent columns of a multiple sequence alignment. The guide first describes the program flow and then the required input and parameters for the commandline and webserver instances of both tools. A visualisation for the *EGF*-protein Pfam [4,5] family and a comparison visualisation for the *hammerhead-RNA* Rfam clan [6] with corresponding command line calls are used as output examples. Detailed model view has been inspired by visualisation provided by SAM (drawmodel) [10].

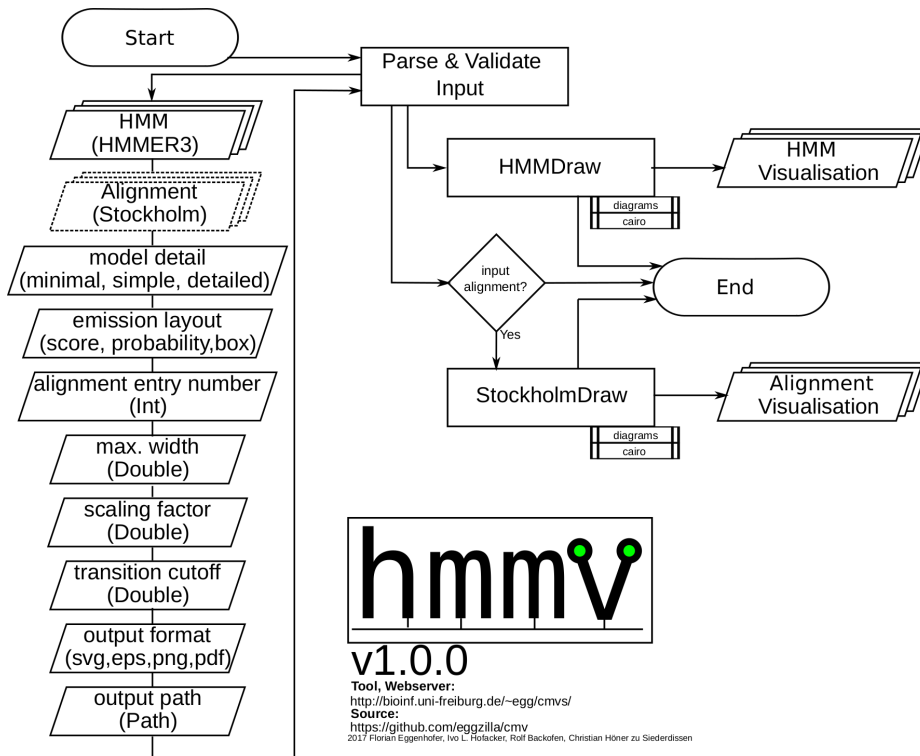

**Fig. 1.** Detailed flowchart representation of HMMV, showing options on the left, processing in the center and output on the right.

### C.1 Program flowcharts

Flowchart representation of HMMV (see Figure 1) showing the possible options for the commandline tool and the processing of input models via HMMDraw. Optional input alignments trigger the output of alignment visualisation via StockholmDraw. Both modules are based on the diagrams library and a cairo backend. Flowchart representation of HMMCV (see Figure 2) showing possible options for the commandline tool and the processing of input models and input comparisons via HMMDraw. Linked nodes are highlighted in both alignment and model visualisation. Both modules are based on the diagrams library and a cairo backend.

### C.2 Input

Example inputs can be found in the Help section of the webservice and on the webserver submission (HMMV, HMMCV) pages for each tool.

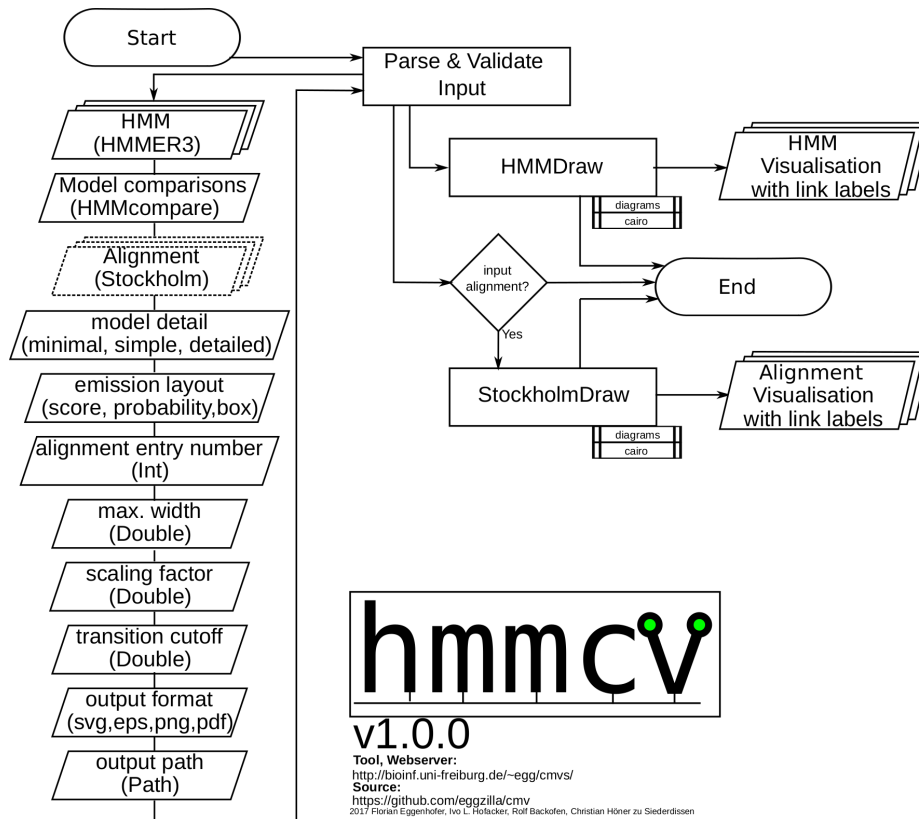

**Fig. 2.** Flowchart representation of HMMCV, showing options on the left, processing in the center and output on the right.

**HMM (-m)** Input models are supported in HMMER3 [11] (see HMMER User-guide) format, as used by Pfam [4,5] and as part of Rfam [12] Infernal [2] models. Multiple input models can be provided by concatenating them in one file, see *hammerhead-RNA* family clan sample file. The webservice accepts a file upload, the commandline tool a absolute filepath.

**Alignment (-s)** Optionally the multiple sequence alignment used to construct the input model can be provided in Stockholm format, e.g. *EGF* alignment. For multiple input models the same number of alignments must be provided. The alignments must be concatenated into one file, in the same order as the models (e.g. *hammerhead-RNA*). Provide a file upload for the webservice or a absolute filepath for the commandline tool.

**Comparison (-r)** HMMCV requires a comparison file, detailing the relationship between the input models. The commandline tool requires an absolute filepath. This format is derived from the CMCompare output format and contains on each line following white space separated fields: model1Name model2Name linkscore1 linkscore2 linksequence model1matchednodes model2matchednodes

Here is a example line from a hammerhead clan comparison, the whole file can be found here: hammerheadClan-comparison.

```
Hammerhead_1 Hammerhead_3 6.168 5.244 GUCCAGUAAUAGGAC [17,18,19,20,21,22,23,23,24,25,26,27,28]
[36,37,38,39,40,41,42,43,44,45,46,47,48]
```

**Detail level (-d)** Three detail level for each node are available:

- minimal - showing the node number.
- simple - showing emission probabilities
- detailed - showing emission and transition probabilities

**Emission layout (-e)** Controls display of emission probabilities for detail levels simple and detailed. The selected variant is shown next to the emitted symbol.

- box - fill state of a box
- score - bit score, as a floating point number
- probability - as a floating point number

**Output format (-f)** Available output formats are pdf, png, svg and ps. The webservice always generates svg by default for rendering of the preview.

**Max. number of alignment entries (-n)** This controls how many entries are displayed for optionally uploaded alignments.

**Image size scaling factor (-c)** Scales the result image by set factor. Please consider that resulting .svg output can be easily rescaled.

**Transition probability cutoff (-t)** Minimum necessary cutoff for a transition probability to be displayed.

**Output directory path (only cmdline, -o)** Absolute path to output directory

**Help (only cmdline, -help)** Prints help with all default options and commandline parameters

### C.3 Commandline usage

HMMV visualisation for the Piwi protein family, as used for the webservice, can be obtained with the following commandline call:

```
HMMV -d detailed -m Piwi.hmm -s /home/user/PF02171_seed.txt
```

HMMCV comparison visualisation for the hammerhead-*RNA* clan can be computed like this:

```
HMMCV -d detailed -m /home/user/hammerhead.hmm -s /home/user/hammerhead.stockholm.txt  
-r /home/user/hammerhead.hmmc -f pdf
```

### C.4 Output

**HMMV output** For each input model a outputfile in the requested format is generated. Als filename the modelname encoded in the file is used and as file extension the request output format (.png,.svg,.ps,.pdf). If stockholm alignments have been provided, then for each model a alignment visualisation with index colums is created. The alignment file name is the model name, followed by ".aln" and then the requested file format extension. The webservice gzips all results and provides a download link. Following are minimal (see Figure 3), simple (see Figure 4) and detailed (see Figure 5 6) visualisations for the *EGF* protein Pfam family. The results for this and the other models can be viewed by clicking the sample button of the HMMV webservice. The webservice also creates a zoom- and panable preview, that can be expanded by clicking.

, showing nodes with their index and emission probabilities.

**HMMCV output** While also providing visualisation output for each model and corresponding alignment, HMMCV additionally annotates regions found to be linked by model comparison via color tags. Each provided model is associated with a color that is depicted in the legend table. The nodes of each model visualisation are then tagged with the color of the linked model. The coloring is also applied to the running index of the alignment visualisation. This allows to study in detail which parts of models are connected, or shared in e.g. clans and which not. The file naming scheme is similar to HMMV. The following example comparison was computed for the whole Hammerhead clan from Rfam, pairwise comparing Hammerhead\_HH9, Hammerhead\_3, Hammerhead\_1, Hammerhead\_II and Hammerhead\_HH10 with the CMCompare webserver. The comparison results from the covariance models were mapped on the prefilter *HMMs* supplied with each covariance model with the included auxiliary *CMctoHMMC* tool. The result for the Hammerhead\_HH9 *RNA* with the linked regions of the other models is shown in minimal (see Figure 8), simple (see Figures 9, 10) and detailed (see Figures 11, 12, 13) visualisations and in the alignment visualisation (see Figure 14). The results for this and the other models can be viewed by clicking the sample button of the HMMCV webservice.



# EGF

|    |    |    |    |    |    |    |
|----|----|----|----|----|----|----|
| 0  | 1  | 2  | 3  | 4  | 5  | 6  |
| 7  | 8  | 9  | 10 | 11 | 12 | 13 |
| 14 | 15 | 16 | 17 | 18 | 19 | 20 |
| 21 | 22 | 23 | 24 | 25 | 26 | 27 |
| 28 | 29 | 30 | 31 | 32 |    |    |

**Fig. 3.** Minimal detail *EGF* Pfam family visualisation, just showing model nodes with their index.

## C.5 Examples

Additional examples for the first 1600 models from Pfam in 3 detail labels can be found here: [Link](#).

## D CM-Tools

Covariance, also called *RNA* family, models are used to represent the sequence and structure information of *RNA* molecules. The guide first describes the program flow and then the required input and parameters for the commandline and webserver instances of both tools. Parameters that only work for the command line tool and not on the webserver are annotated with "cmdline-only". This guide uses the *tRNA* family for a demonstration of CMV (Covariance model visualisation) in minimal the hammerhead-*RNA* clan for demonstration of CMCV (Covariance model comparison visualisation) also in three levels of detail. Layout of the detailed output has been inspired by depictions used in the *Infernal* user guide and the book 'Biological sequence analysis' [13]. For both tools a webserver corresponding command line calls are use

## D.1 Program flowcharts

The flowchart representation of **CMV** (see Figure 15) shows that the tool accepts multiple covariance models and optionally the corresponding Stockholm alignments as input. After parsing and validating the input, for each provided model a visualisation output is created via the **CMDraw** module, which is based on the **diagrams** library and a **cairo** backend. The optional input alignments are used for creating a visualisation of the input alignment via **StockholmDraw** module.

Flowchart representation of **CMCV** (see Figure 16) showing possible options for the commandline tool and the processing of input models and input comparisons via **CMDraw**. Optional input alignments trigger the output of alignment visualisation via **StockholmDraw**. Linked nodes are highlighted in both alignment and model visualisation. Both modules are based on the **diagrams** library and a **cairo** backend.

## D.2 Input

Example inputs can be found in the **Help** section of the webservice and on the webserver submission (**CMV**, **CMCV**) pages for each tool.

**CM (-m)** Input models are supported in **Infernal** (see **Infernal User-guide**) format, as used by **Rfam** or constructed by **RNAlien** [7] or the **RNA** workbench [14,15]. Here is the *tRNA* family as example. Multiple input models can be provided by concatenating them in one file, see *hammerhead-RNA* family clan sample file. The webservice accepts a file upload, the commandline tool a absolute filepath.

**Alignment (-s)** Optionally the multiple sequence alignment used to construct the input model can be provided in Stockholm format, e.g. *tRNA* alignment. For multiple input models the same number of alignments must be provided. The alignments must be concatenated into one file, in the same order as the models (e.g. *hammerhead-RNA*). Provide a file upload for the webservice or a absolute filepath for the commandline tool.

**Comparison (-r)** **CMCV** requires a comparison file, detailing the relationship between the input models. The commandline tool requires an absolute filepath. The used **CMCompare** output format contains on each line following white space separated fields:

```
model1Name model2Name linkscore1 linkscore2 linksequence model1matchednodes model2matchednodes
```

Here is a example line from a hammerhead clan comparison, the whole file can be found here: [hammerheadClan-comparison](#).

```
Hammerhead_1 Hammerhead_3 6.168 5.244 GUCCCAGUAAUAGGAC (((((.....))))
```

```
(((.....))) [17,18,19,20,21,22,23,23,24,25,26,27,28] [36,37,38,39,40,41,42,43,44,45,46,47,48]
```

The **CMCompare** Webserver [9] offers **cmcv.result** files that can be directly used as input for (-r) Link.

**Detail level (-d)** Three detail level for each node are available:

- minimal - showing the node number.
- simple - showing node number and node type
- detailed - showing node number, type, emission and transition probabilities

**Emission layout (-e)** Controls display of emission probabilities for detail levels simple and detailed. The selected variant is shown next to the emitted symbol.

- box - fill state of a box
- score - bit score, as a floating point number
- probability - as a floating point number

**Model layout (-l)**

- tree - model is branched at each bifurcation according to guide tree
- flat - nodes are all arranged on a line

**Secondary structure visualisation tool (only commandline, -x)** CMV and CMCV can create input files for the secondary structure visualisation tools **forna** [16] and **R2R** [17]. This input file contains the consensus secondary structure of the input alignment. Moreover CMCV labels nucleotides that are annotated to be similar with compared models in the input files and in case of **R2R** color encodes them according to the color scheme used for the model comparison visualisation. In case of the webservice both visualisations are triggered on providing a input alignment.

- **forna** - for each model a input structure file and a color scheme is generated for upload to forna
- **R2R** - for each model a input file for R2R is generated

**Output format (-f)** Available output formats are pdf, png, svg and ps. The webservice always generates svg by default for rendering of the preview.

**Max. number of alignment entries (-n)** This controls how many entries are displayed for optionally uploaded alignments.

**Image size scaling factor (-c)** Scales the result image by set factor. Please consider that resulting .svg output can be easily rescaled.

**Transition probability cutoff (-t)** Minimum necessary cutoff for a transition probability to be displayed.

**Output directory path (only cmdline, -o)** Absolute path to output directory

**Help (only cmdline, -help)** Prints help with all default options and commandline parameters

### D.3 Commandline usage

CMV visualisation for the tRNA family, as used as sample for the webservice, can be obtained with the following commandline call:

```
CMV -m tRNA.cm -s RF00005.stockholm.txt -f pdf
```

CMCV comparison visualisation for the hammerheadRNA clan can be computed like this:

```
CMCV -d simple -m /home/user/hammerheadClan.cm -s /home/user/hammerheadClan.sto -r /home/user/hammerheadClan.cmcompare -f pdf -l tree
```

### D.4 Output

**CMV output** For each input model a outputfile in the requested format is generated. Also filename the modelname encoded in the file is used and as file extension the request output format (.png,.svg,.ps,.pdf). If stockholm alignments have been provided, then for each model a alignment visualisation with index columns is created. The alignment file name is the model name, followed by ".aln" and then the requested file format extension. The webservice compresses all results and provides a download link. Extensive information about the node types (with abbreviations MATP, MATL, MATR, BIF, ROOT, BEGL, BEGR, END) and state types (with abbreviations P, L, T, B, D, S, E) used by covariance models can be found in the **Infernal** user guide, specifically pages 52 and 53. The webservice also creates a zoom- and panable preview, that can be expanded by clicking. Following is the minimal (see Figure 17), simple (see Figure 18 ) and detailed (see Figures 19, 20, 21, 22, 23, 24, 28) *tRNA Rfam* family model visualisation. For the corresponding alignment visualisation see Figure 26.

**Secondary structure visualisation** Table provides the consensus secondary structure visualisation of the structural alignment for each model by R2R as well as **forna**.

**CMCV output** CMCV also provides visualisation output for each model and corresponding alignment. The naming scheme is similar to *CMV*. However it annotates regions found to be linked by model comparison via color tags. Each provided model is associated with a color that is depicted in the legend table. The nodes of each model visualisation are then tagged with the color of the linked model. The coloring is also applied to the running index of the alignment visualisation. This allows to study in detail which parts of models are connected, or shared in e.g. clans and which not. Extensive information about the node types (with abbreviations MATP, MATL, MATR, BIF, ROOT, BEGL, BEGR, END) and state types (with abbreviations P, L, T, B, D, S, E) used by covariance models can be found in the *Infernal* user guide, specifically pages 52 and 53. The following example shows the result for the *Hammerhead.HH9 RNA* CMCV output as minimal (see Figure 29), simple (see Figures 30, 31) and detailed (see Figures 32, 33, 34, 35, 36, 37, 38, 39, 40, 41, 42) visualisation. The alignment is shown in Figure 43.

The webservice also creates a zoom- and panable preview, that can be expanded by clicking.

**Secondary structure visualisation** Moreover linked nodes are also annotated in the consensus secondary structure of the provided models, if a stockholm alignment with consensus structure has been provided. This allows to identify specific secondary structure elements that are linked between families. This is done for pairs of models with *R2R* as well as *forna*.

## D.5 Examples

Additional examples for all models from *Rfam* in three detail labels can be found here: [Link](#). Examples for comparisons of *Rfam* clans can be found here: [Link](#).

## D.6 Benchmark

Runtime and memory consumption for the first 100 *Rfam* families are shown in Table 1 and were computed on a *Intel(R) Xeon(R) CPU E5-2630 v4 @ 2.20GHz* cpu with a single thread.

| Rfam family name | Elapsed real time [seconds] | Maximum resident set size [kbytes] |
|------------------|-----------------------------|------------------------------------|
| 5S_rRNA          | 12.79                       | 715140                             |
| 5_8S_rRNA        | 13.36                       | 784956                             |
| U1               | 16.41                       | 867316                             |
| U2               | 17.77                       | 1071648                            |
| tRNA             | 06.61                       | 444100                             |
| Vault            | 08.85                       | 550828                             |

|                 |       |         |
|-----------------|-------|---------|
| U12             | 15.04 | 850800  |
| Hammerhead_3    | 06.40 | 389308  |
| RNaseP_nuc      | 24.38 | 1391292 |
| RNaseP_bact_a   | 39.83 | 1953500 |
| RNaseP_bact_b   | 34.91 | 1963264 |
| U3              | 23.86 | 1220600 |
| 6S              | 19.19 | 1063516 |
| DsrA            | 09.75 | 558360  |
| U4              | 12.97 | 765668  |
| SNORD14         | 09.33 | 565648  |
| Metazoa_SRP     | 31.33 | 1810600 |
| CsrB            | 29.43 | 1770356 |
| Y_RNA           | 10.02 | 555420  |
| U5              | 12.99 | 698060  |
| Spot_42         | 10.88 | 729424  |
| GcvB            | 18.18 | 1115148 |
| tmRNA           | 34.49 | 1799168 |
| Telomerase-vert | 42.88 | 2172452 |
| Telomerase-cil  | 16.64 | 895780  |
| U6              | 06.99 | 527964  |
| let-7           | 08.84 | 555552  |
| Intron_gpI      | 24.16 | 1257588 |
| Intron_gpII     | 08.05 | 539248  |
| RNase_MRP       | 23.07 | 1353624 |
| SECIS_1         | 05.71 | 409756  |
| Histone3        | 03.95 | 302612  |
| MicF            | 08.60 | 543284  |
| RprA            | 10.39 | 574844  |
| OxyS            | 12.28 | 683444  |
| RRE             | 35.82 | 1939584 |
| IRE_I           | 03.95 | 302136  |
| PrfA            | 12.39 | 702136  |
| DicF            | 05.22 | 363060  |
| rne5            | 30.26 | 1812964 |
| Entero_OriR     | 09.44 | 717796  |
| CopA            | 08.12 | 561304  |
| Plasmid_R1162   | 06.33 | 513064  |
| Phage_pRNA      | 20.36 | 1241372 |
| SNORA73         | 19.07 | 1180256 |
| snoR30          | 07.31 | 513408  |
| mir-2           | 06.97 | 443128  |
| Entero_CRE      | 06.05 | 385656  |
| SNORD36         | 06.58 | 399556  |
| FMN             | 10.97 | 744152  |
| mir-17          | 08.44 | 536708  |
| lin-4           | 06.78 | 443840  |
| mir-7           | 08.95 | 557020  |

|              |       |         |
|--------------|-------|---------|
| SNORD25      | 06.24 | 423344  |
| SNORD96      | 05.78 | 416272  |
| SNORA71      | 12.44 | 777396  |
| RyhB         | 05.67 | 405092  |
| HgcF         | 17.56 | 880720  |
| TPP          | 09.58 | 593776  |
| HgcE         | 12.84 | 714416  |
| IRES_HCV     | 24.23 | 1378276 |
| HgcC         | 11.61 | 738716  |
| SscA         | 08.23 | 545260  |
| HgcG         | 25.36 | 1362644 |
| snoR9        | 12.48 | 706812  |
| U7           | 06.34 | 386840  |
| SNORD15      | 10.51 | 607972  |
| SNORD21      | 06.94 | 452528  |
| SNORD24      | 06.20 | 397048  |
| SNORD29      | 05.18 | 366832  |
| SNORD73      | 05.72 | 389652  |
| SNORA75      | 11.00 | 747536  |
| mir-156      | 08.46 | 541540  |
| mir-29       | 06.40 | 440452  |
| mir-166      | 11.40 | 690084  |
| mir-181      | 07.29 | 520416  |
| SraB         | 14.83 | 880924  |
| MicA         | 06.16 | 434544  |
| OmrA-B       | 08.18 | 538008  |
| yybP-ykoY    | 13.90 | 816788  |
| ArcZ         | 10.06 | 566836  |
| SraG         | 16.49 | 872468  |
| GlmZ_SraJ    | 19.11 | 1173580 |
| CsrC         | 22.38 | 1325628 |
| SNORD28      | 05.76 | 397704  |
| SNORD27      | 05.78 | 384396  |
| SNORD26      | 06.35 | 397440  |
| SNORD30      | 05.43 | 395044  |
| SNORD31      | 05.16 | 374096  |
| SNORA74      | 20.63 | 1195224 |
| SNORA62      | 12.20 | 798120  |
| SNORA63      | 10.27 | 723496  |
| SNORD18      | 05.42 | 390436  |
| HDV_ribozyme | 07.85 | 551132  |
| snoPyro_CD   | 04.42 | 315896  |
| U8           | 10.19 | 728664  |
| snoR71       | 09.31 | 539732  |
| SNORD22      | 09.48 | 570696  |
| 7SK          | 30.55 | 1778300 |
| SraC_RyeA    | 12.30 | 768748  |

---

Table 1: Benchmark table showing the runtimes and memory consumption for computing a detailed covariance model visualisation with *CMV* on a *Intel(R) Xeon(R) CPU E5-2630 v4 @ 2.20GHz* cpu with a single thread.

## E Auxiliary tools

We created two auxiliary tools to simplify the handling of comparison results.

### E.1 CMCToHMMC

**CMCompare** results contain the node intervals of linked models. Since both the **Infernal** covariance models and the **HMMER** hidden markov models have the alignment columns the were derived from annotated, it is possible to map these intervals from a *CM* to a *HMM* of the same family. This tool was used to create the **HMMCompare** files used for the **HMMC**. Here is a example call:

```
CMCToHMMC -c /home/user/models.cm -h /home/user/models.hmm -r /home/user/model.cmcwsresult
```

### E.2 HMMCtoCMC

**HMMCompare** results contain the node intervals of linked models. Since both the **Infernal** covariance models and the **HMMER** hidden markov models have the alignment columns the were derived from annotated, it is possible to map these intervals from a *HMM* to a *CM* of the same family. Here is a example call:

```
HMMCtoCMC -c /home/user/models.cm -h /home/user/models.hmm -r /home/user/model.cmcwsresult
```



## References

1. Robert D Finn, Jody Clements, and Sean R Eddy. Hmmer web server: interactive sequence similarity searching. *Nucleic acids research*, page gkr367, 2011.
2. Eric P Nawrocki and Sean R Eddy. Infernal 1.1: 100-fold faster RNA homology searches. *Bioinformatics*, 29(22):2933–2935, 2013.
3. Eric P. Nawrocki, Sarah W. Burge, Alex Bateman, Jennifer Daub, Ruth Y. Eberhardt, Sean R. Eddy, Evan W. Floden, Paul P. Gardner, Thomas A. Jones, John Tate, and Robert D. Finn. Rfam 12.0: updates to the rna families database. *Nucleic Acids Research*, 43(D1):D130–D137, 2015.
4. Robert D Finn, Jaina Mistry, Benjamin Schuster-Böckler, Sam Griffiths-Jones, Volker Hollich, Timo Lassmann, Simon Moxon, Mhairi Marshall, Ajay Khanna, Richard Durbin, et al. Pfam: clans, web tools and services. *Nucleic acids research*, 34(suppl 1):D247–D251, 2006.
5. Robert D. Finn, Penelope Coghill, Ruth Y. Eberhardt, Sean R. Eddy, Jaina Mistry, Alex L. Mitchell, Simon C. Potter, Marco Punta, Matloob Qureshi, Amaia Sangrador-Vegas, Gustavo A. Salazar, John Tate, and Alex Bateman. The pfam protein families database: towards a more sustainable future. *Nucleic Acids Research*, 44(D1):D279–D285, 2016.
6. Paul P Gardner, Jennifer Daub, John Tate, Benjamin L Moore, Isabelle H Osuch, Sam Griffiths-Jones, Robert D Finn, Eric P Nawrocki, Diana L Kolbe, Sean R Eddy, et al. Rfam: Wikipedia, clans and the decimal release. *Nucleic acids research*, 39(suppl 1):D141–D145, 2011.
7. Florian Eggenhofer, Ivo L Hofacker, and Christian Höner zu Siederdisen. RNAlieN - unsupervised RNA family model construction. *Nucleic Acids Research*, 44(17):8433, 2016.
8. Christian Höner zu Siederdisen and Ivo L Hofacker. Discriminatory power of RNA family models. *Bioinformatics*, 26(18):i453–i459, 2010.
9. Florian Eggenhofer, Ivo L. Hofacker, and Christian Höner zu Siederdisen. CM-Compare webserver: comparing RNA families via covariance models. *Nucleic Acids Research*, 41(W1):W499, 2013.
10. Richard Hughey and Anders Krogh. Sam: Sequence alignment and modeling software system. Technical report, Santa Cruz, CA, USA, 1995.
11. Sean R Eddy. Accelerated profile HMM searches. *PLoS Comput Biol*, 7(10):e1002195, 2011.
12. Sarah W Burge, Jennifer Daub, Ruth Eberhardt, John Tate, Lars Barquist, Eric P Nawrocki, Sean R Eddy, Paul P Gardner, and Alex Bateman. Rfam 11.0: 10 years of RNA families. *Nucleic acids research*, page gks1005, 2012.
13. Richard Durbin, Sean R Eddy, Anders Krogh, and Graeme Mitchison. *Biological sequence analysis: probabilistic models of proteins and nucleic acids*. Cambridge university press, 1998.
14. Björn A. Grüning, Jörg Fallmann, Dilmurat Yusuf, Sebastian Will, Anika Erxleben, Florian Eggenhofer, Torsten Houwaart, Bèrènice Batut, Pavankumar Videm, Andrea Bagnacani, Markus Wolfien, Steffen C. Lott, Youri Hoogstrate, Wolfgang R. Hess, Olaf Wolkenhauer, Steve Hoffmann, Altuna Akalin, Uwe Ohler, Peter F. Stadler, and Rolf Backofen. The RNA workbench: best practices for RNA and high-throughput sequencing bioinformatics in galaxy. *Nucleic Acids Research*, 45(W1):W560–W566, 2017.
15. Rolf Backofen, Jan Engelhardt, Anika Erxleben, Jörg Fallmann, Björn Grüning, Uwe Ohler, Nikolaus Rajewsky, and Peter F Stadler. RNA-bioinformatics: Tools,

- services and databases for the analysis of RNA-based regulation. *Journal of Biotechnology*, 2017.
16. Peter Kerpedjiev, Stefan Hammer, and Ivo L Hofacker. Forna (force-directed RNA): simple and effective online RNA secondary structure diagrams. *Bioinformatics*, page btv372, 2015.
  17. Zasha Weinberg and Ronald R. Breaker. R2R - software to speed the depiction of aesthetic consensus RNA secondary structures. *BMC Bioinformatics*, 12(1):3, 2011.

# EGF

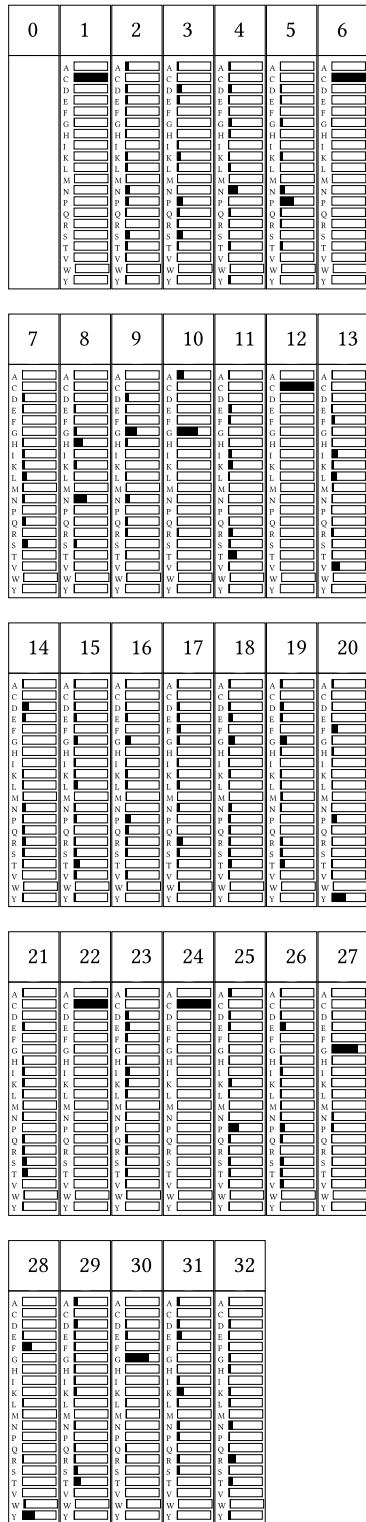

**Fig. 4.** Simple detail *EGF* Pfam family visualisation, showing nodes with their index and emission probabilities.

# EGF

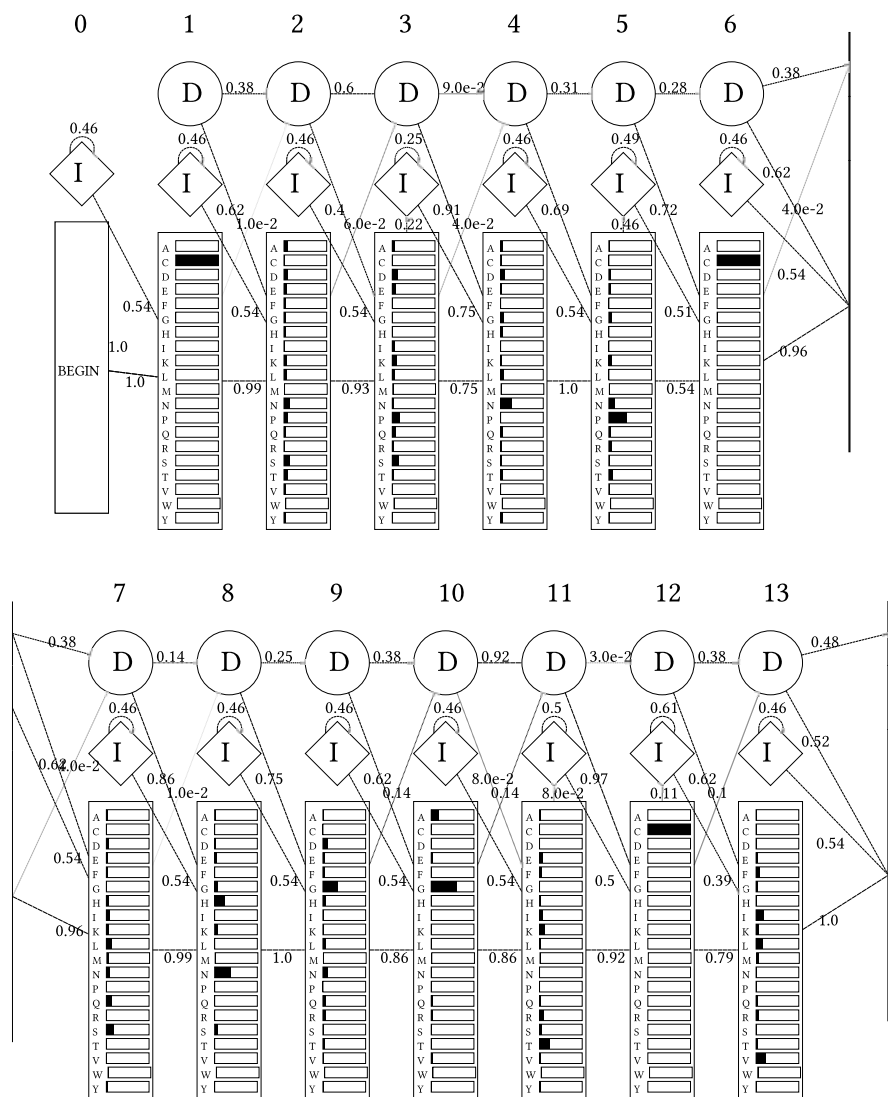

**Fig. 5.** Detailed *EGF* Pfam family visualisation, showing nodes with insertion, deletion and match states and emission and transition probabilities. Transitions below threshold that can be set via option are not shown and line strength corresponds to probability - Part 1

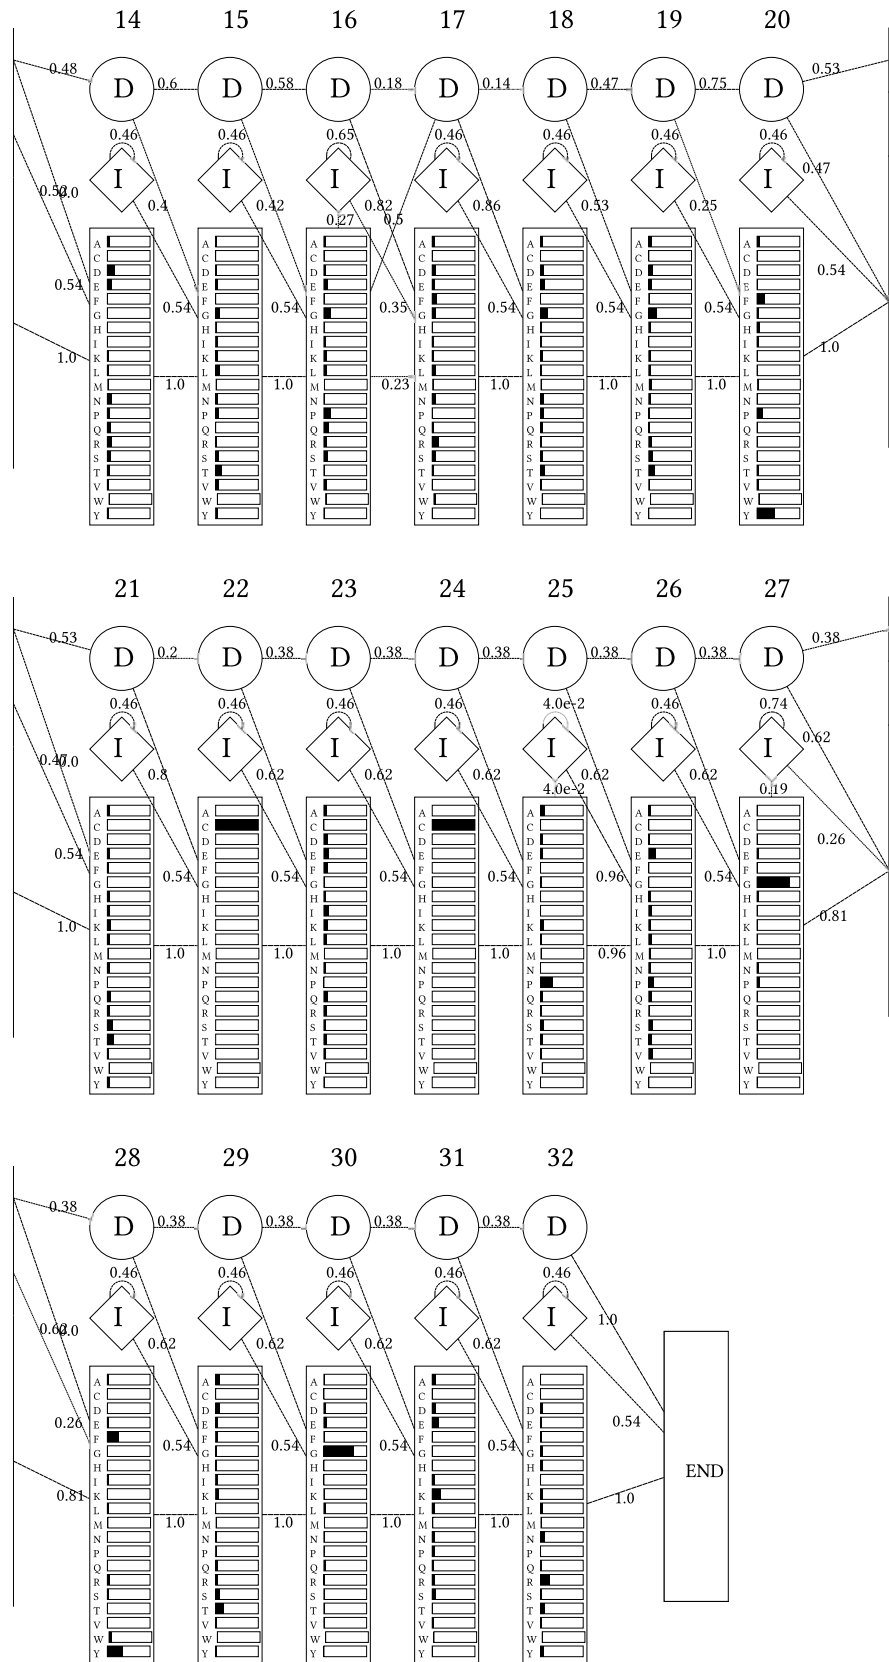

**Fig. 6.** Detailed *EGF* Pfam family visualisation, showing nodes with insertion, deletion and match states and emission and transition probabilities. Transitions below threshold that can be set via option are not shown and line strength corresponds to probability - Part 2



# Hammerhead\_HH9 ■

Legend:

- Hammerhead\_1 ■
- Hammerhead\_3 ■
- Hammerhead\_HH10 ■
- Hammerhead\_II ■

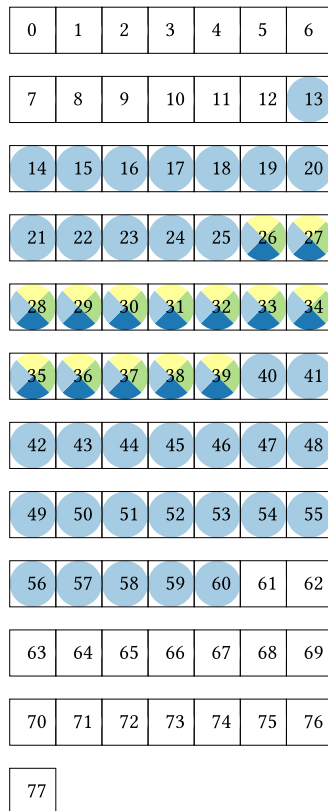

**Fig. 8.** Minimal detail HMMCV visualisation of *Hammerhead\_HH9* with linked nodes highlighted by color. Families corresponding to the color can be looked up in the legend.

# Hammerhead\_HH9

Legend:

Hammerhead\_1 

Hammerhead\_3 

Hammerhead\_HH10 

Hammerhead\_II 

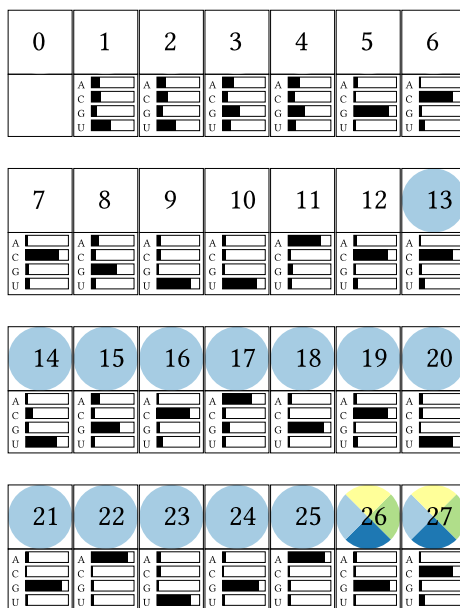

**Fig. 9.** Simple detail HMMCV visualisation of *Hammerhead.HH9* family, showing nodes with their index and emission probabilities. Linked are nodes highlighted by color which correspond to the clan families in the automatically created legend - Part 1.



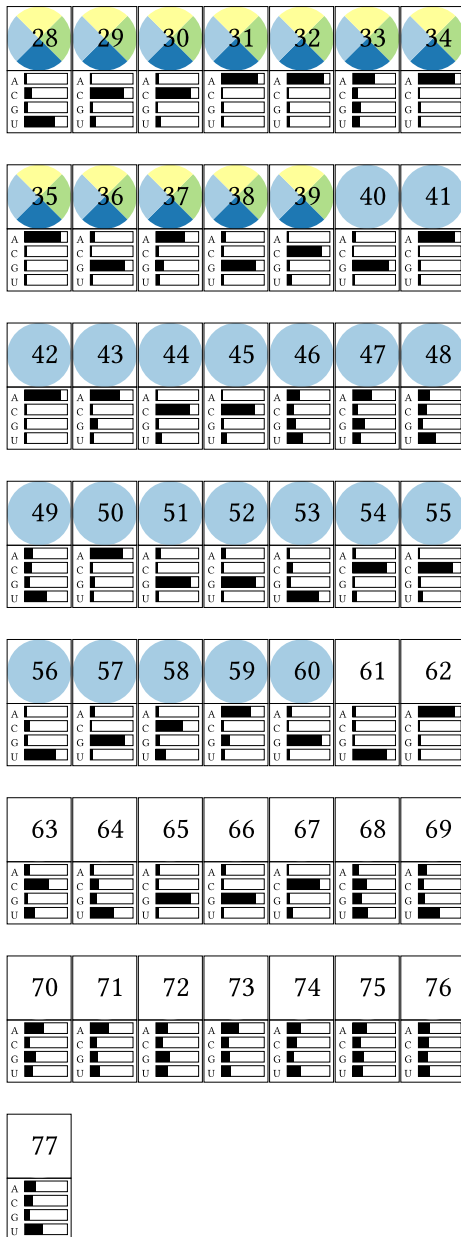

**Fig. 10.** Simple detail HMMCV visualisation of *Hammerhead\_HH9* family, showing nodes with their index and emission probabilities. Linked are nodes highlighted by color which correspond to the clan families in the automatically created legend - Part 2.

# Hammerhead\_HH9 ■

Legend:

Hammerhead\_1 ■

Hammerhead\_3 ■

Hammerhead\_HH10 ■

Hammerhead\_II ■

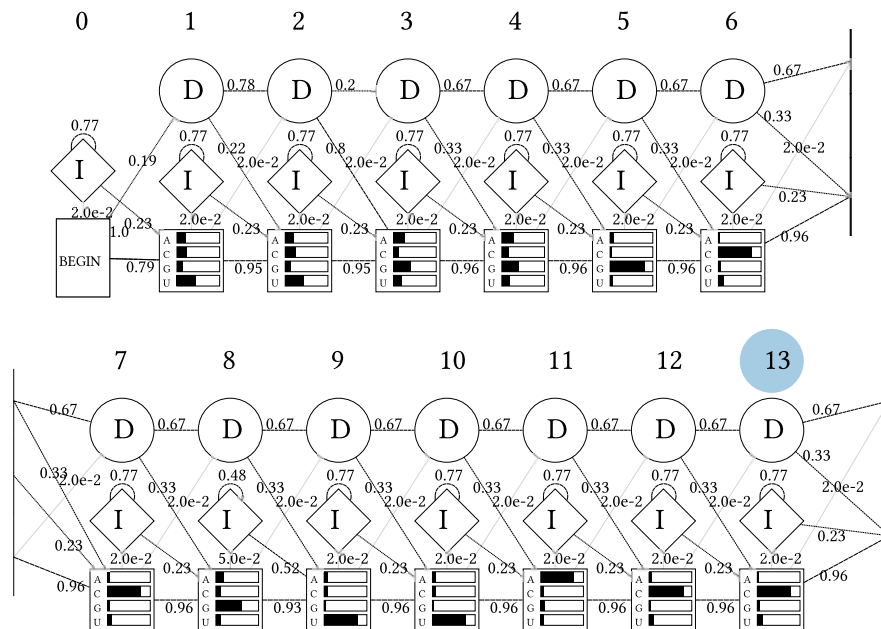

**Fig. 11.** Detailed HMMCV visualisation of *Hammerhead.HH9* family visualisation, showing nodes with insertion, deletion and match states and emission and transition probabilities. Transitions below threshold that can be set via option are not shown and line strength corresponds to probability. Linked are nodes highlighted by color which correspond to the clan families in the automatically created legend - Part1.

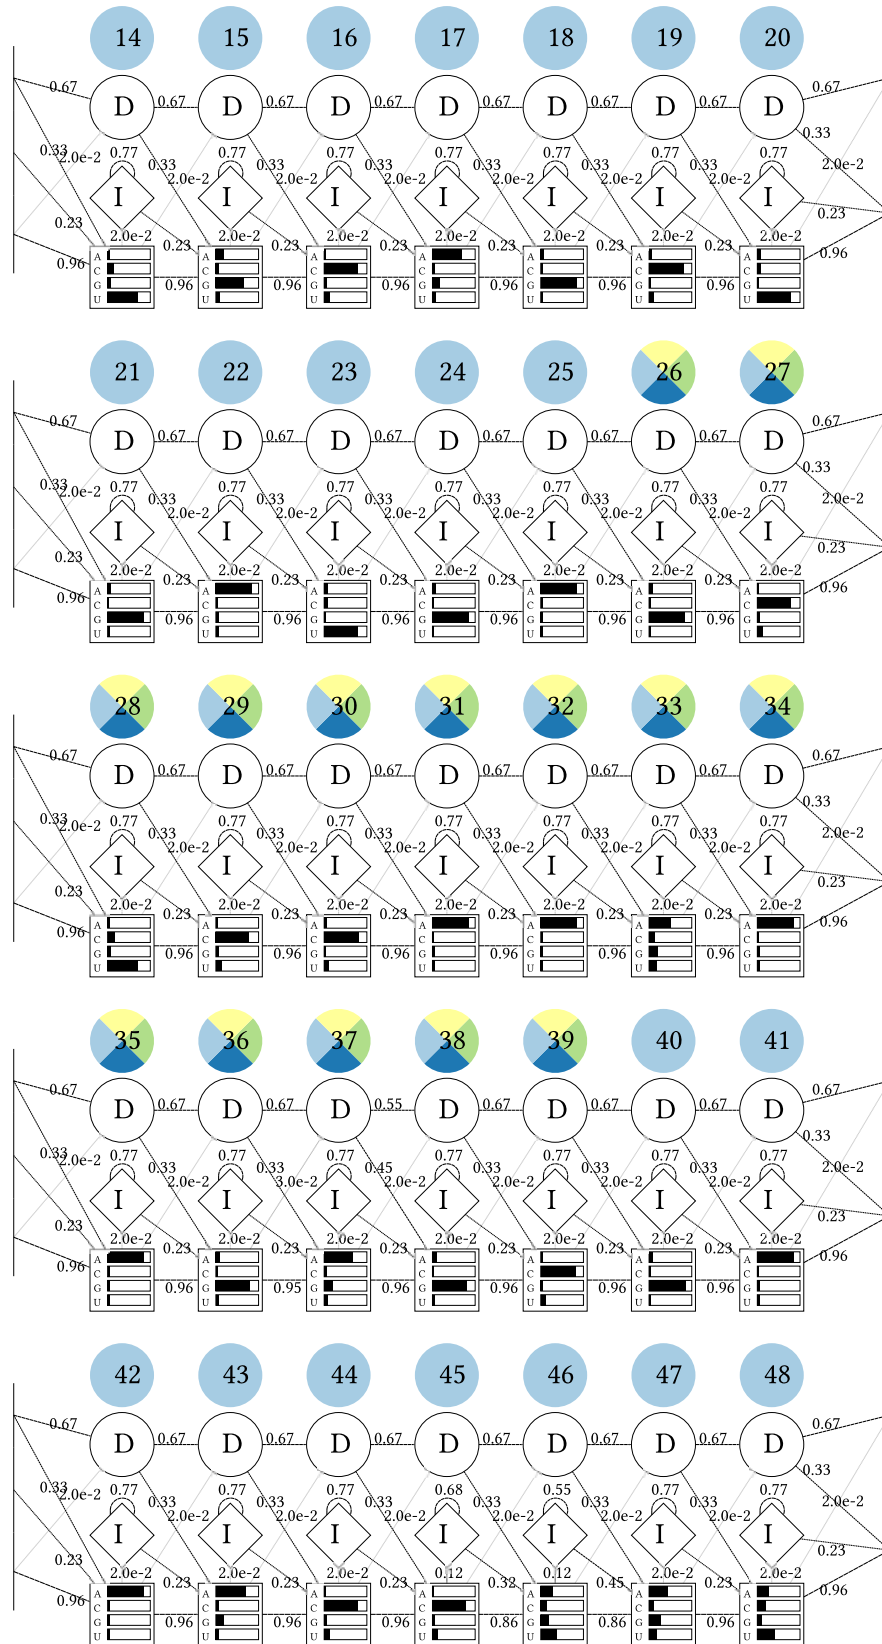

**Fig. 12.** Detailed HMMCV visualisation of *Hammerhead.HH9* family visualisation, showing nodes with insertion, deletion and match states and emission and transition probabilities. Transitions below threshold that can be set via option are not shown and line strength corresponds to probability. Linked are nodes highlighted by color which correspond to the clan families in the automatically created legend - Part2.

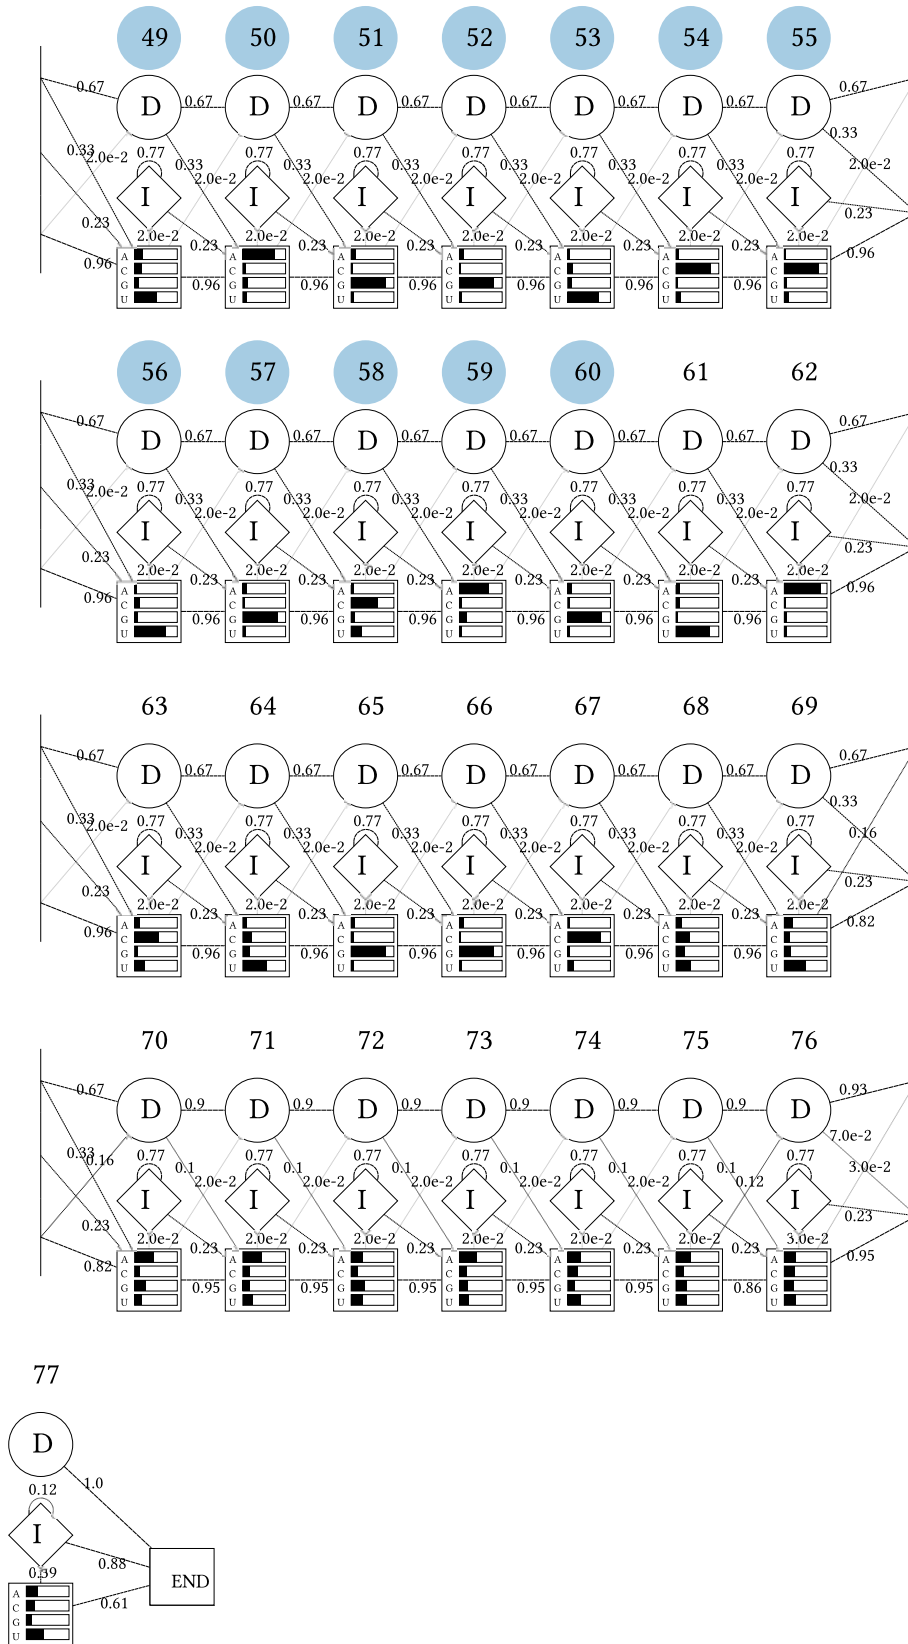

**Fig. 13.** Detailed HMMCV visualisation of *Hammerhead\_HH9* family visualisation, showing nodes with insertion, deletion and match states and emission and transition probabilities. Transitions below threshold that can be set via option are not shown and line strength corresponds to probability. Linked are nodes highlighted by color which correspond to the clan families in the automatically created legend - Part3.

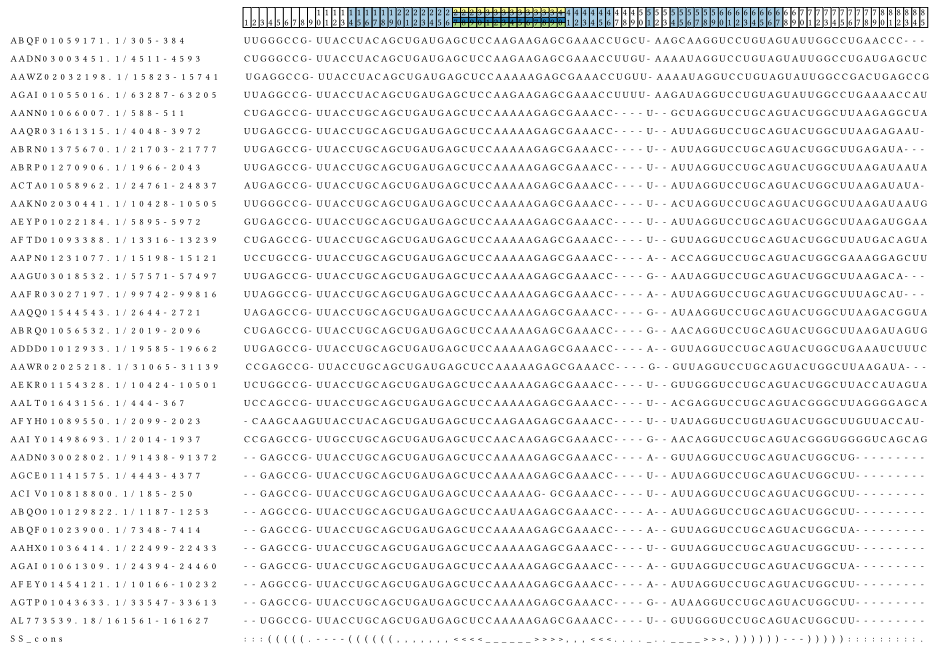

**Fig. 14.** *Hammerhead\_HH9* Rfam family alignment visualisation, the number of alignment entries can be set via option. The displayed column indices allow association with the corresponding nodes in the model. The consensus secondary structure is shown in the last line.

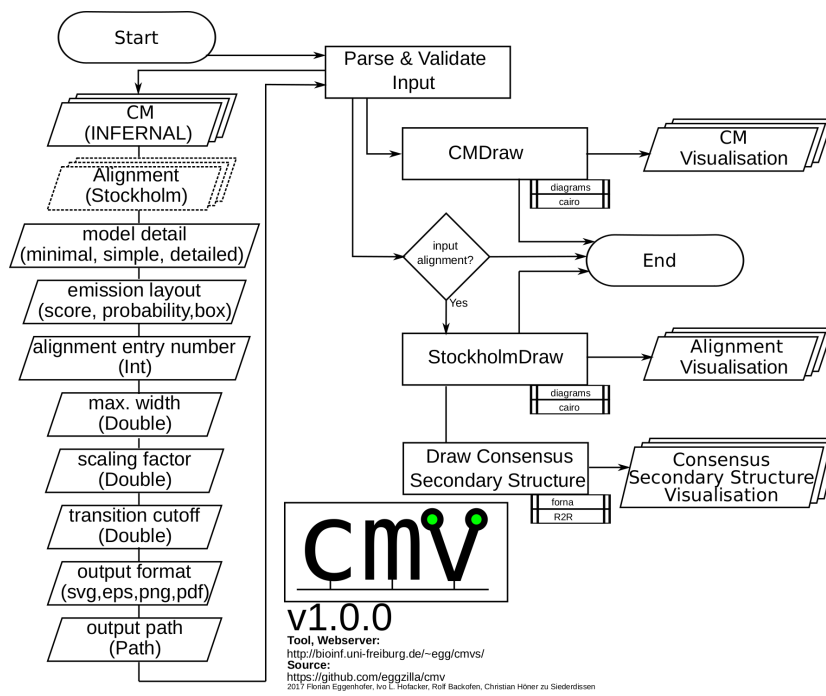

**Fig. 15.** Detailed flowchart representation of CMV, showing options on the left, processing in the center and output on the right.

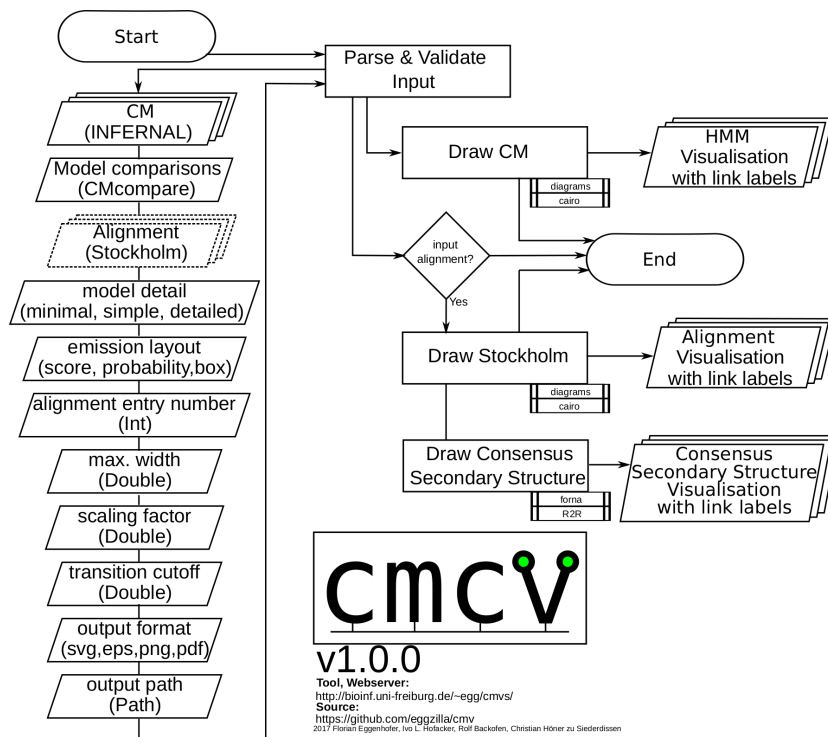

**Fig. 16.** Detailed flowchart representation of CMCV, showing options on the left, processing in the center and output on the right.

# tRNA

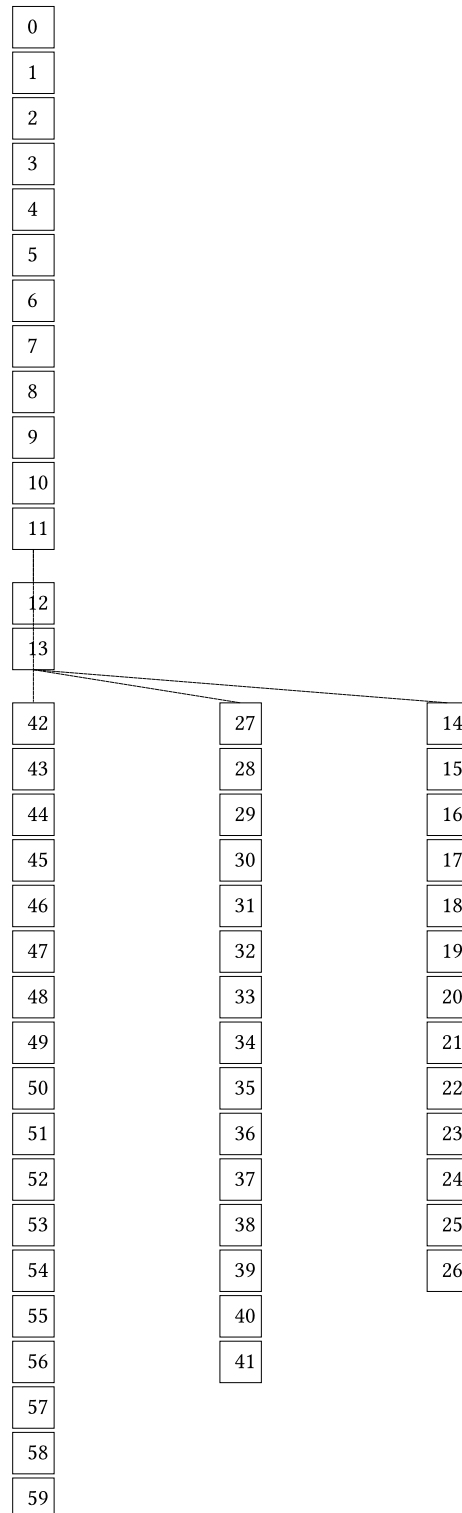

**Fig. 17.** Minimal tRNA Rfam family visualisation, showing model nodes with their index arranged according to guide tree.



# tRNA

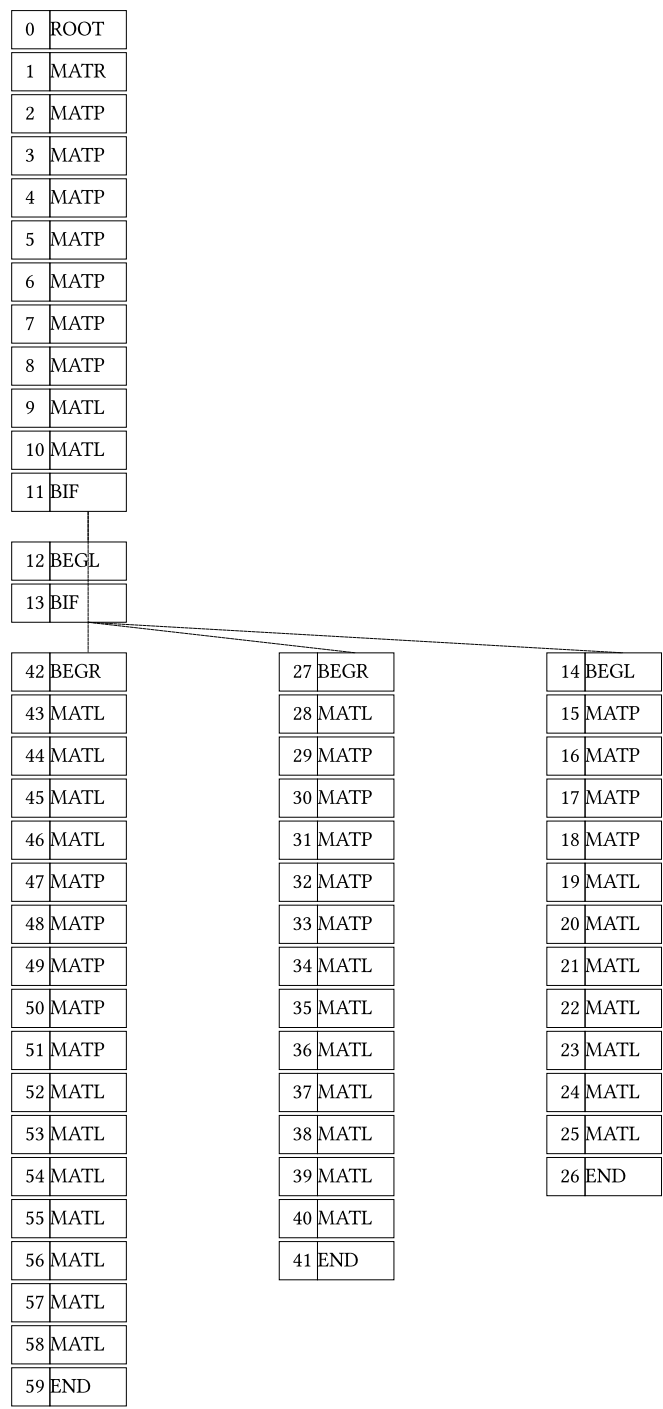

**Fig. 18.** Simple tRNA Rfam family visualisation, showing model nodes, labeled with node type and index, arranged according to guide tree.

## tRNA

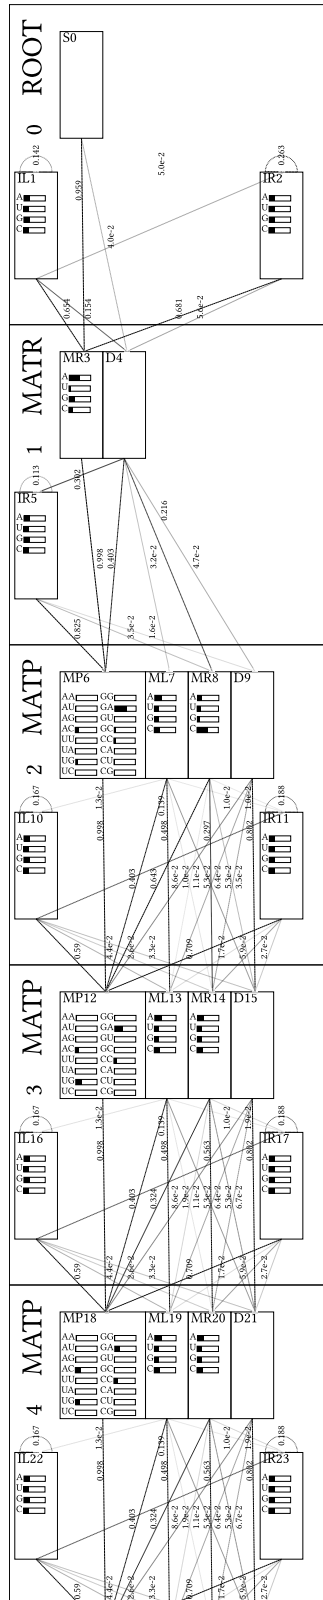

**Fig. 19.** Detailed tRNA Rfam family visualisation, showing nodes with states, emission and transition probabilities, arranged according to guide tree. Transitions below threshold that can be set via option are not shown and line strength corresponds to probability - Part 1

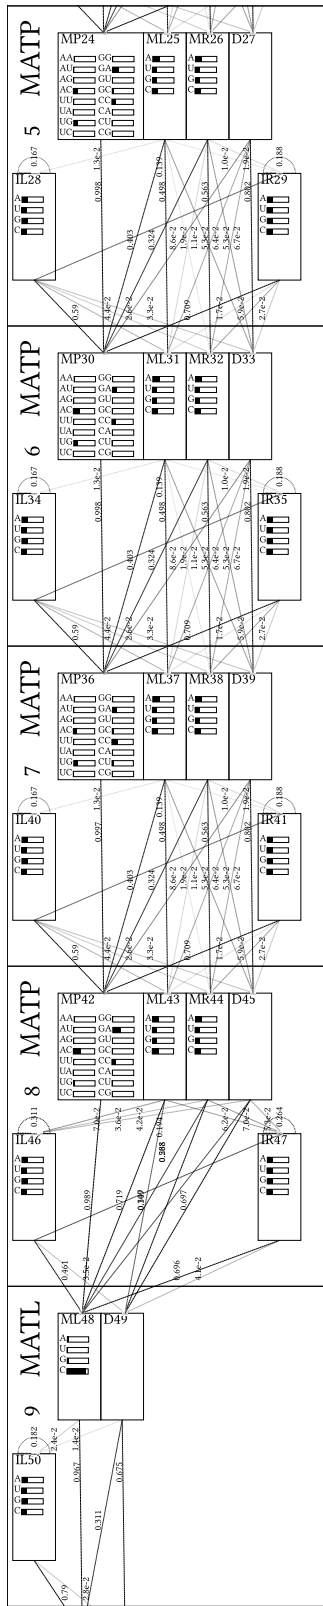

**Fig. 20.** Detailed tRNA Rfam family visualisation, showing nodes with states, emission and transition probabilities, arranged according to guide tree. Transitions below threshold that can be set via option are not shown and line strength corresponds to probability - Part 2

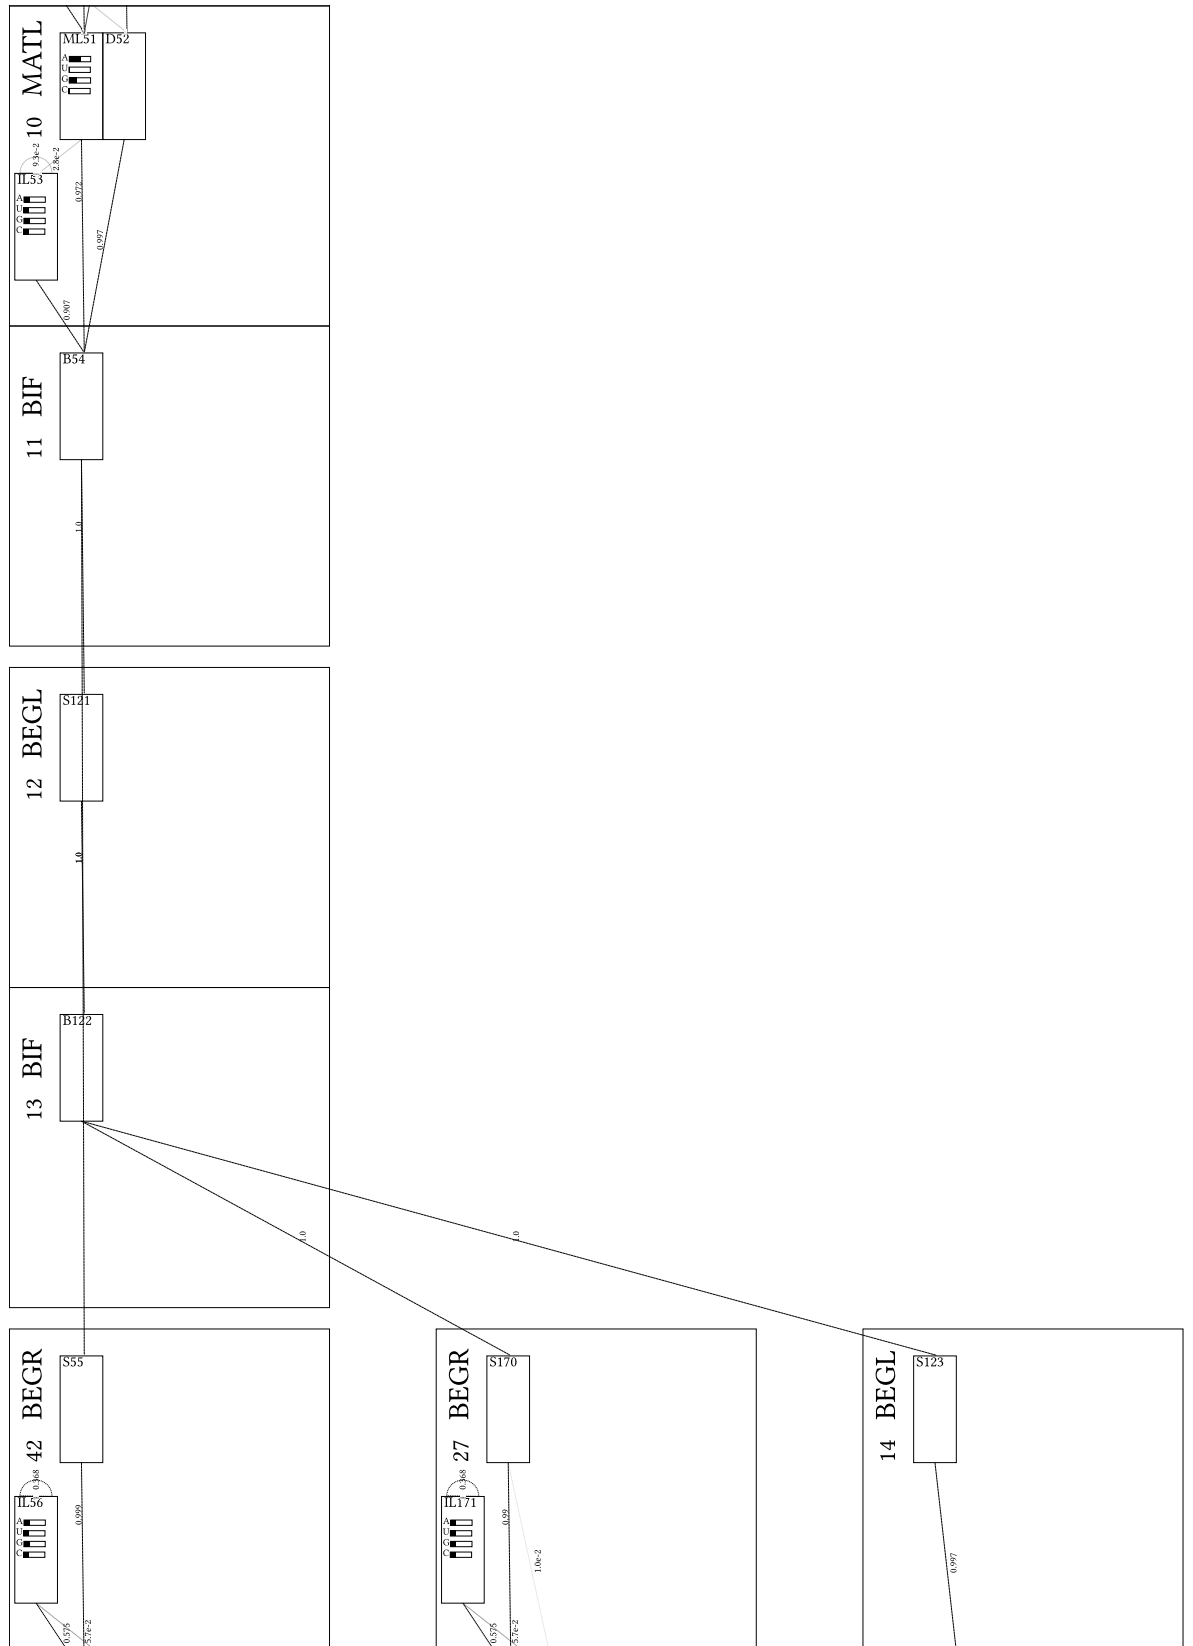

**Fig. 21.** Detailed tRNA Rfam family visualisation, showing nodes with states, emission and transition probabilities, arranged according to guide tree. Transitions below threshold that can be set via option are not shown and line strength corresponds to probability - Part 3

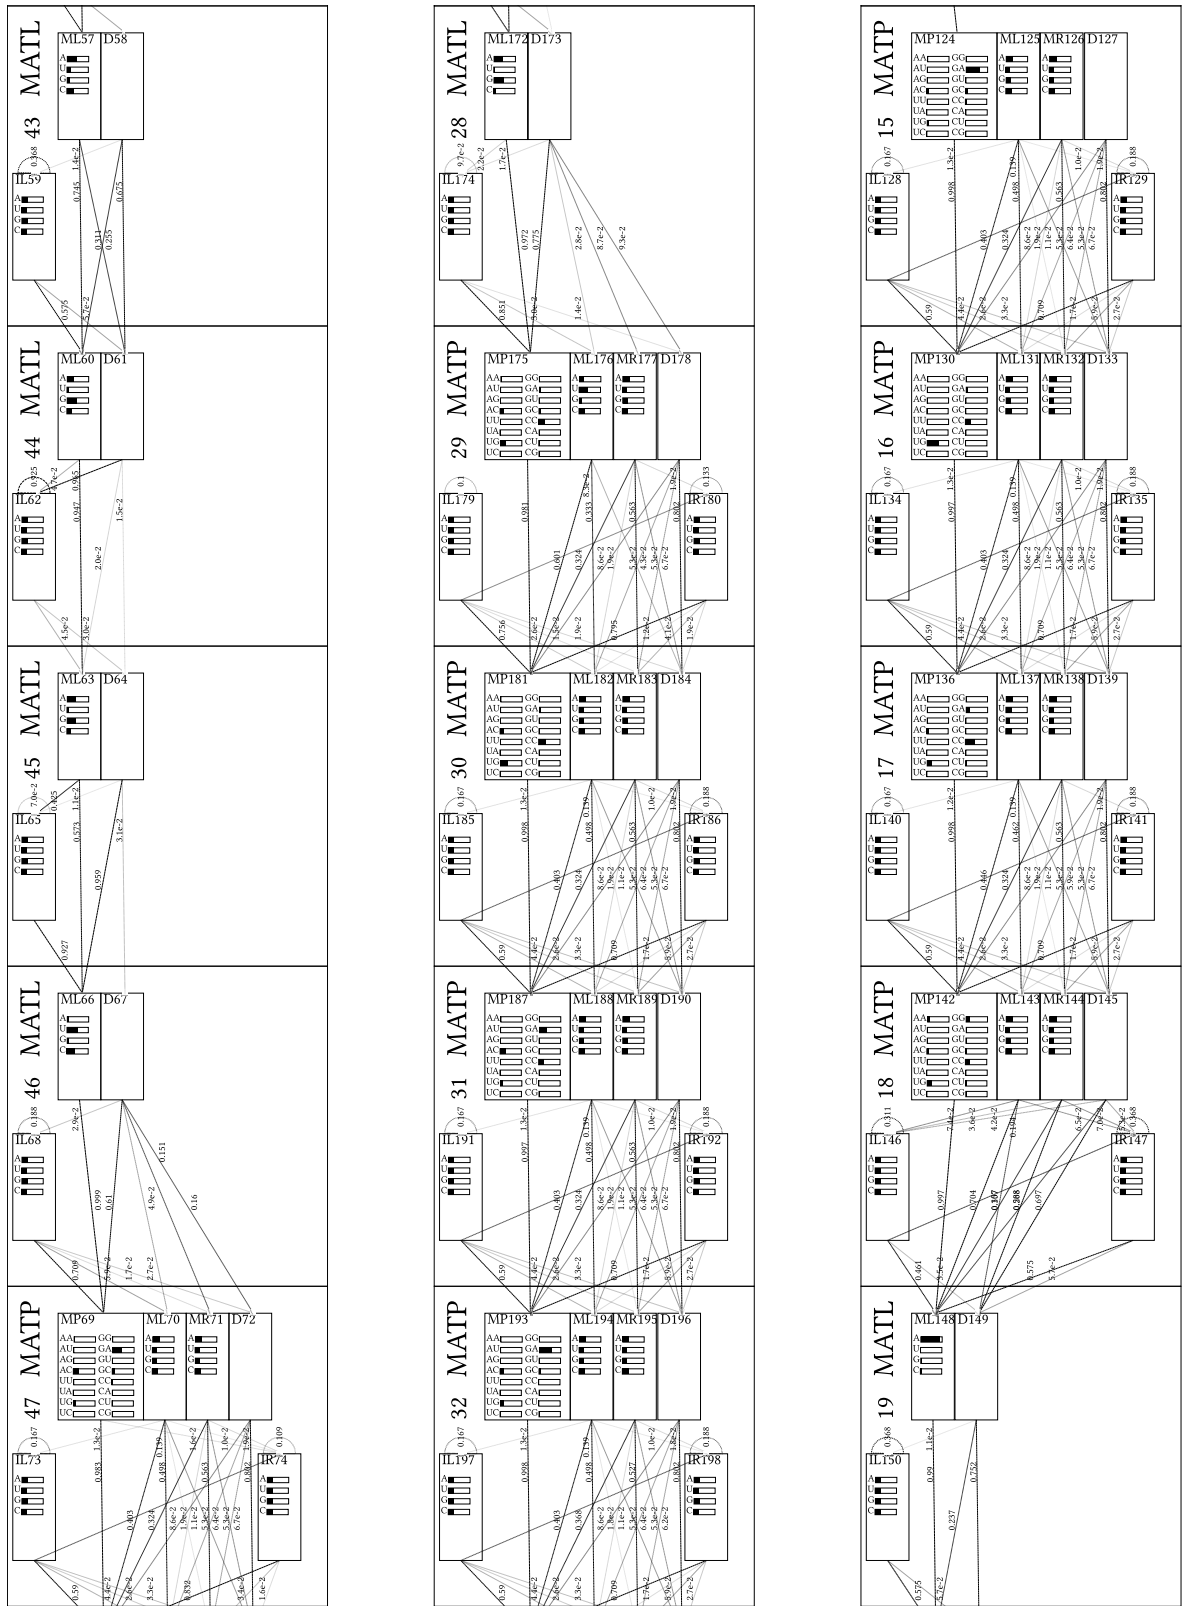

**Fig. 22.** Detailed tRNA Rfam family visualisation, showing nodes with states, emission and transition probabilities, arranged according to guide tree. Transitions below threshold that can be set via option are not shown and line strength corresponds to probability - Part 4

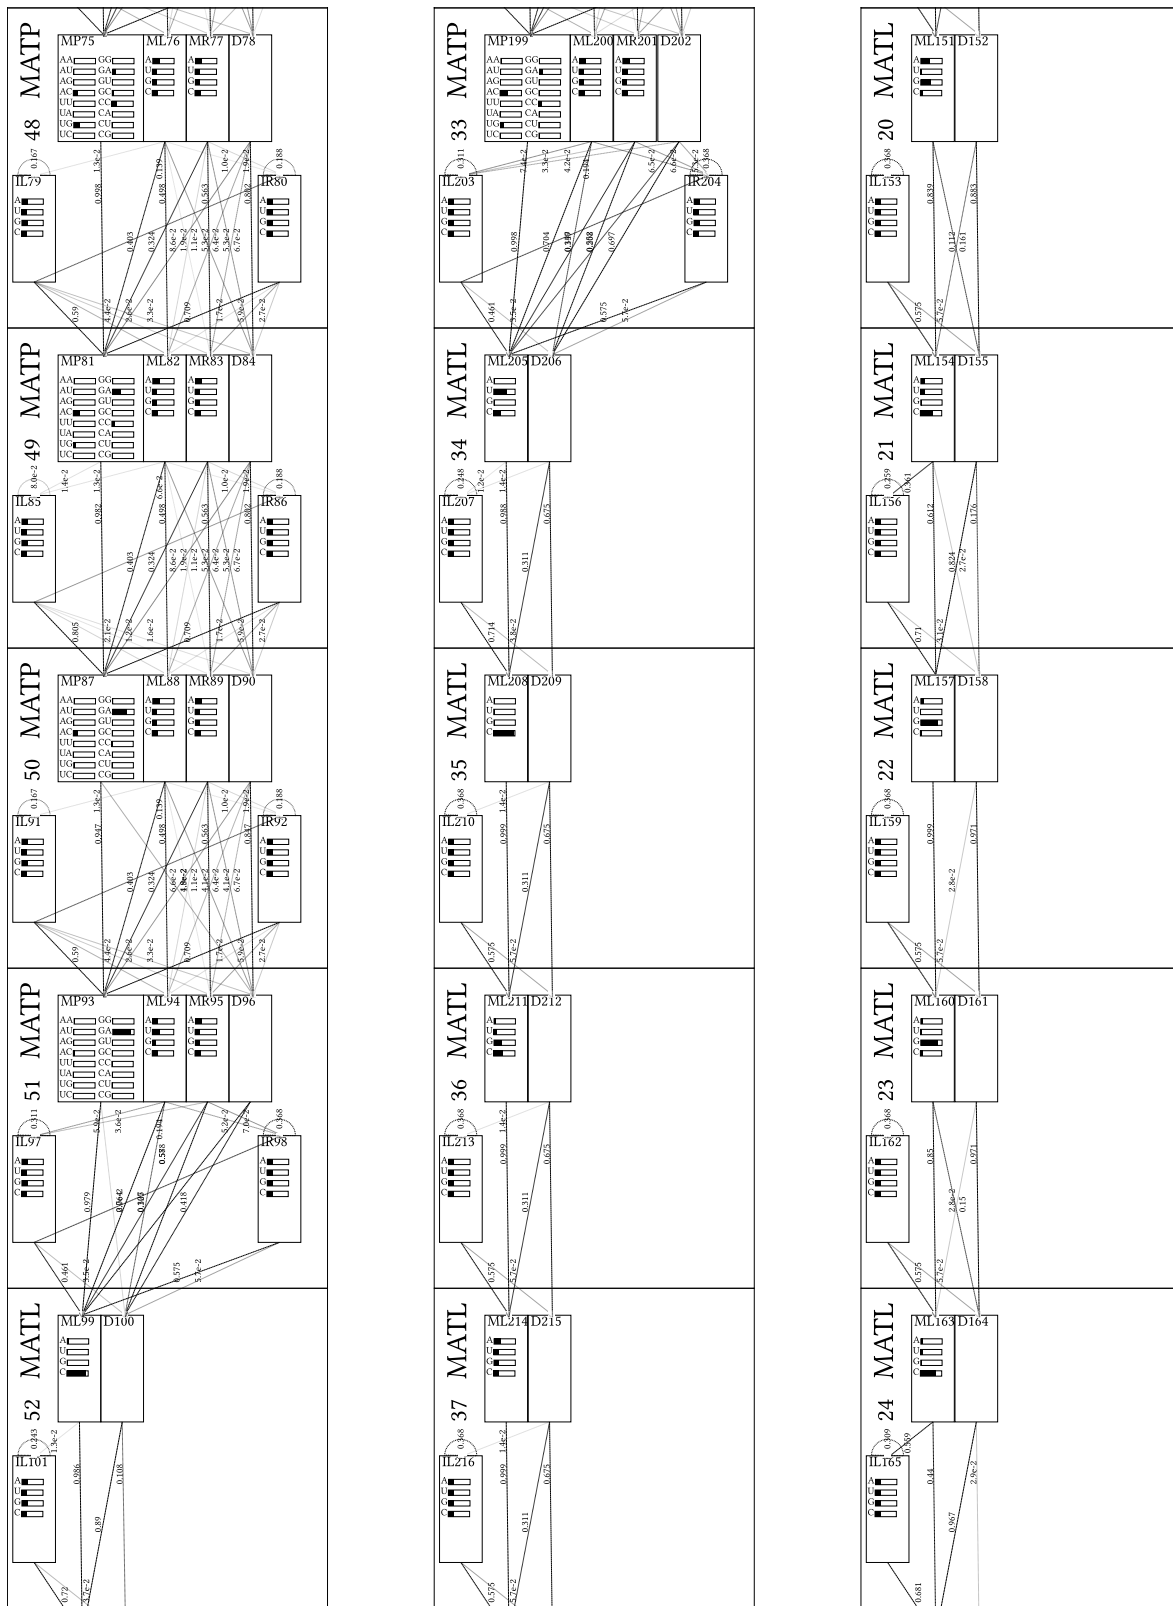

**Fig. 23.** Detailed tRNA Rfam family visualisation, showing nodes with states, emission and transition probabilities, arranged according to guide tree. Transitions below threshold that can be set via option are not shown and line strength corresponds to probability - Part 5

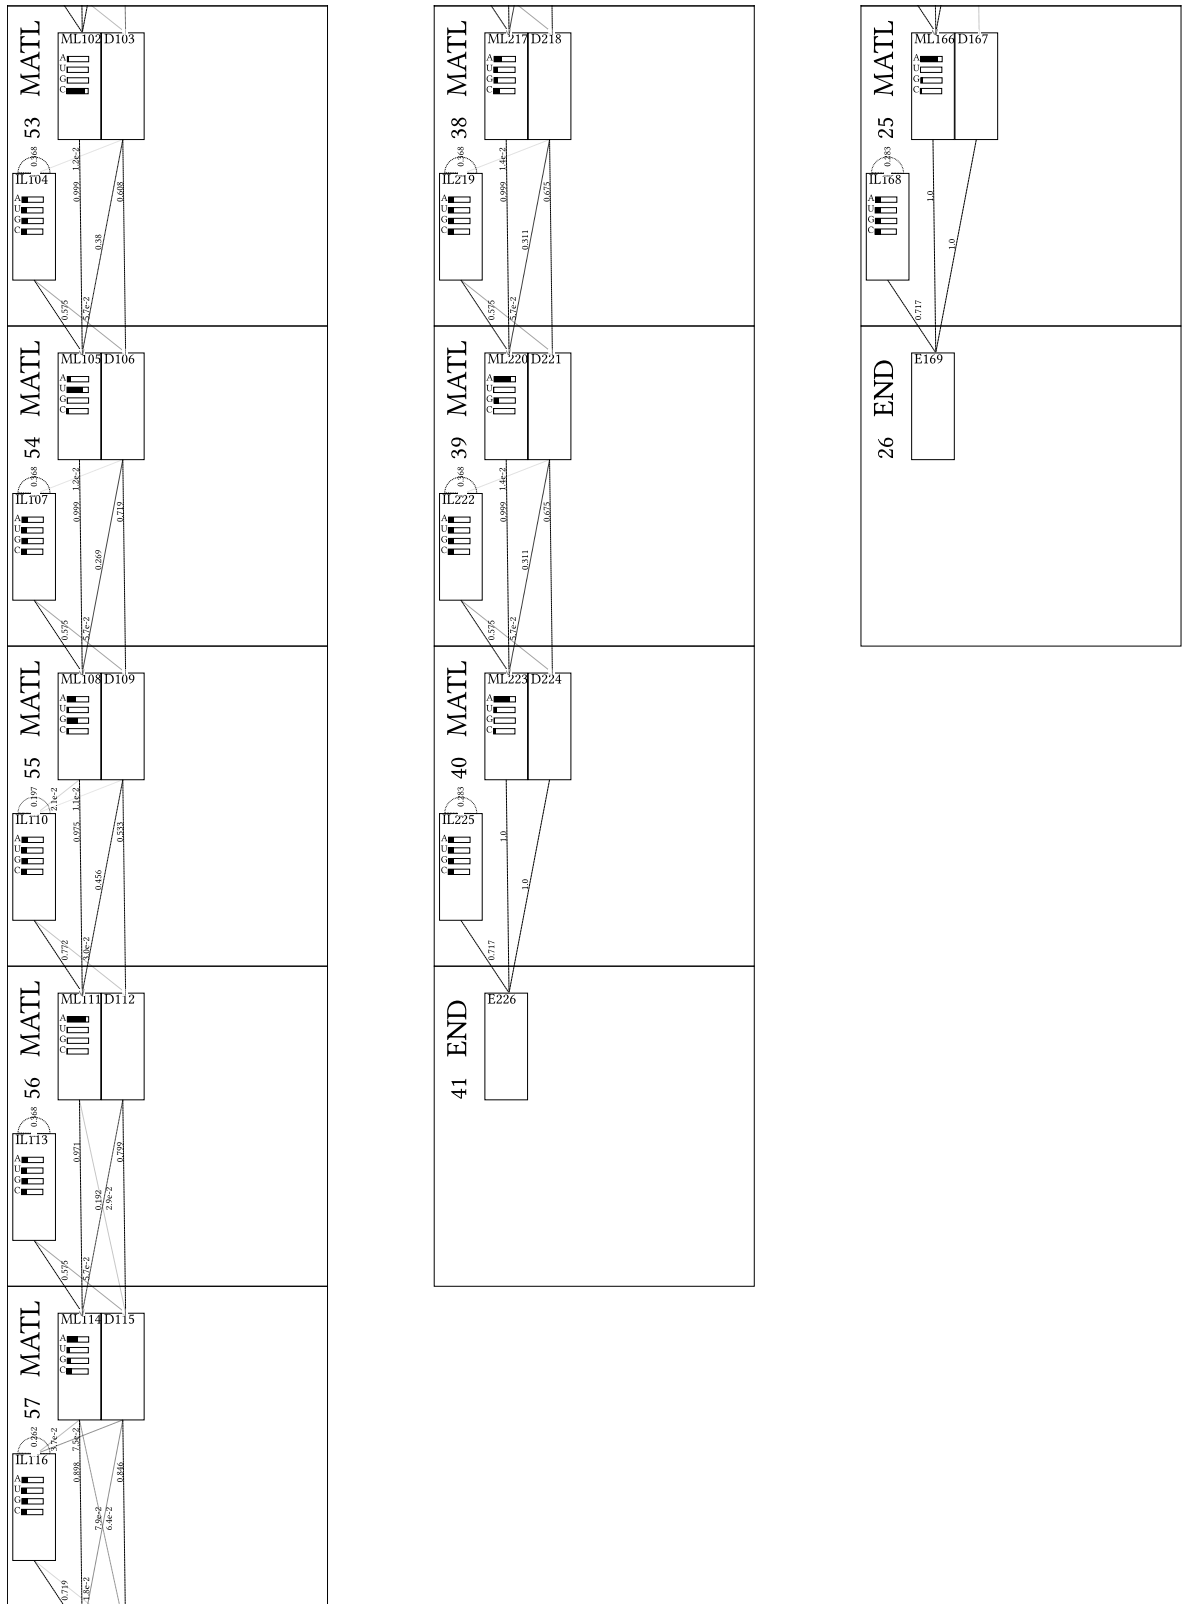

**Fig. 24.** Detailed tRNA Rfam family visualisation, showing nodes with states, emission and transition probabilities, arranged according to guide tree. Transitions below threshold that can be set via option are not shown and line strength corresponds to probability - Part 6

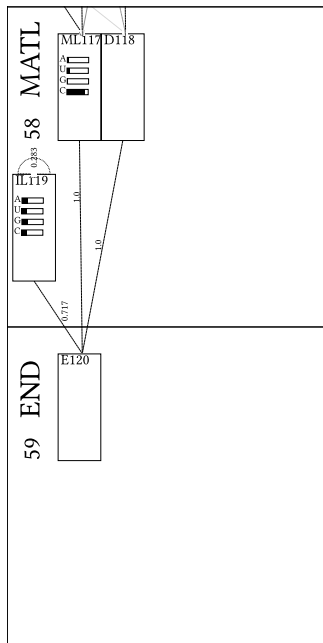

**Fig. 25.** Detailed tRNA Rfam family visualisation, showing nodes with states, emission and transition probabilities, arranged according to guide tree. Transitions below threshold that can be set via option are not shown and line strength corresponds to probability - Part 7



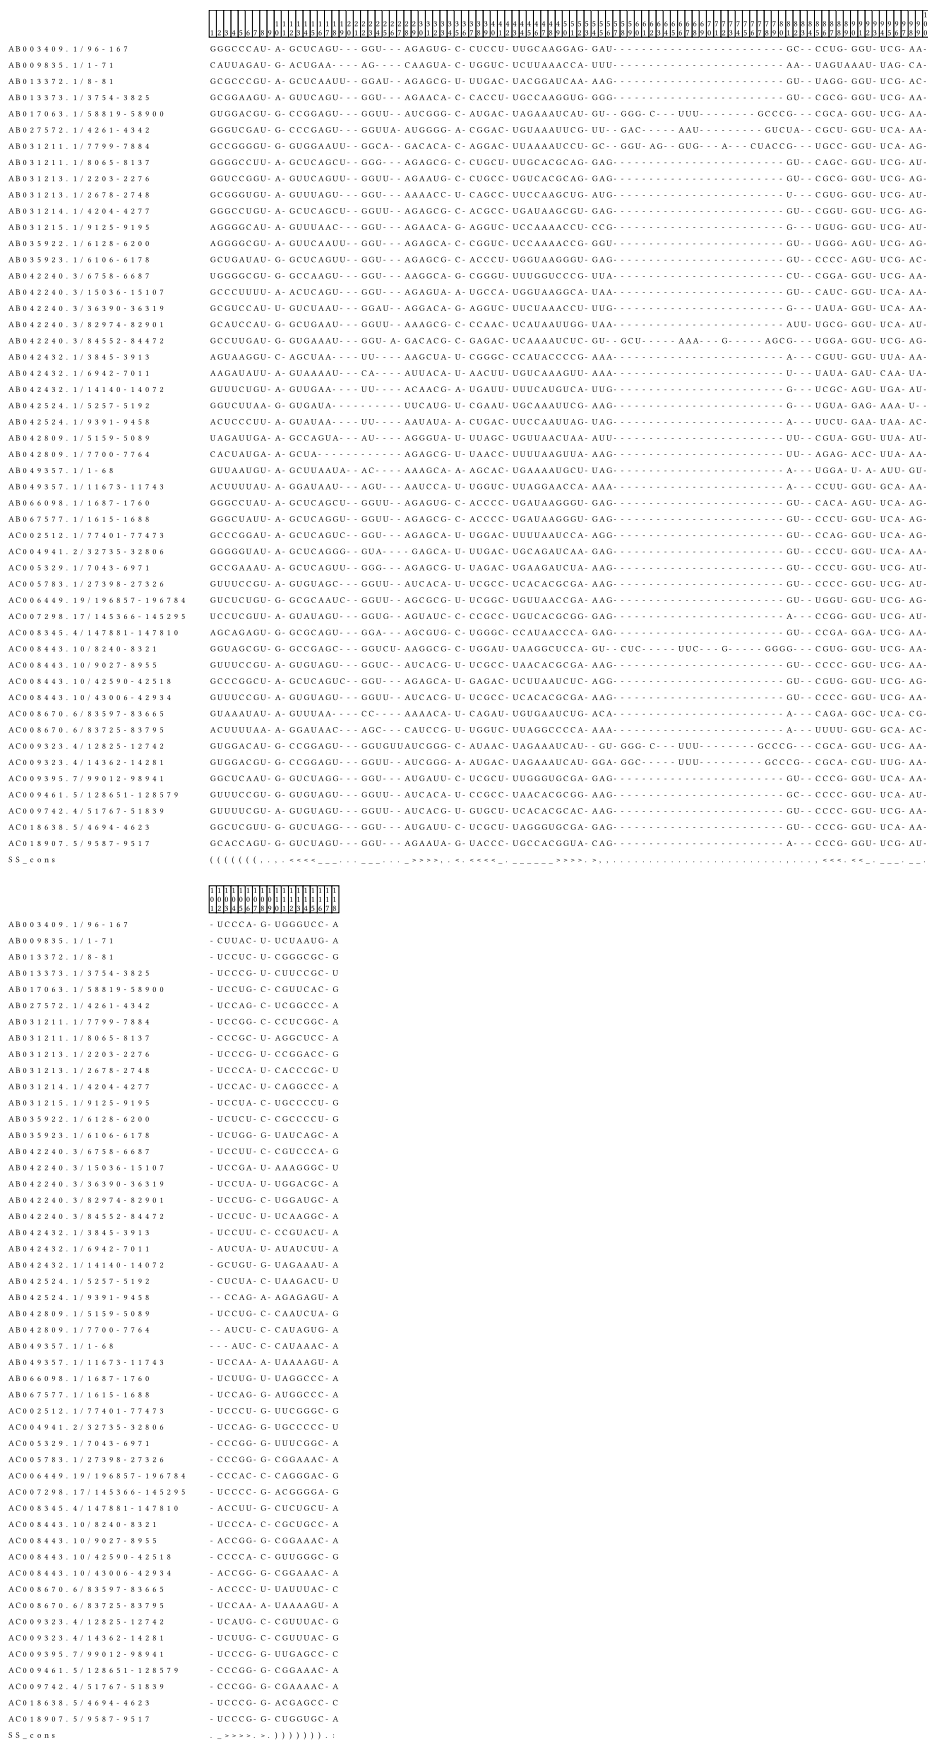

Fig. 26. tRNA Rfam family alignment visualization, the number of alignment entries can be set via option. The displayed column indices allow association with the corresponding nodes in the model. The consensus secondary structure is shown in the last line.

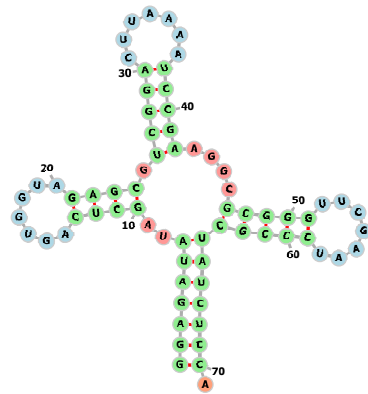

**Fig. 27.** Consensus secondary structure visualisation for tRNA with forna

tRNA

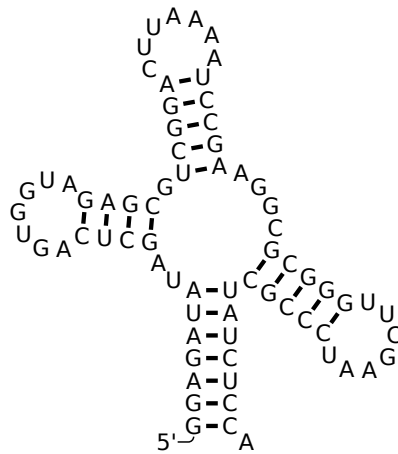

**Fig. 28.** Consensus secondary structure visualisation for tRNA with R2R

# Hammerhead\_HH9 ■

Legend:

- Hammerhead\_1 ■
- Hammerhead\_3 ■
- Hammerhead\_HH10 ■
- Hammerhead\_II ■

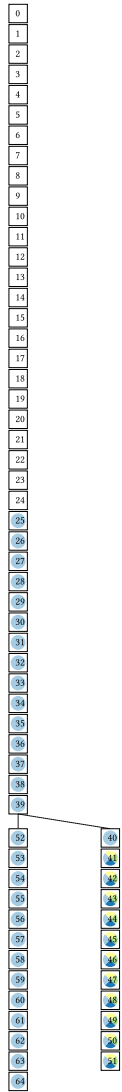

**Fig. 29.** Minimal detail CMCV visualisation of *Hammerhead\_HH9*, showing model nodes with their index arranged according to guide tree.

# Hammerhead\_HH9

Legend:

|                 |                                                                                   |
|-----------------|-----------------------------------------------------------------------------------|
| Hammerhead_1    |  |
| Hammerhead_3    |  |
| Hammerhead_HH10 |  |
| Hammerhead_II   |  |

|    |      |
|----|------|
| 0  | ROOT |
| 1  | MATL |
| 2  | MATL |
| 3  | MATL |
| 4  | MATR |
| 5  | MATR |
| 6  | MATR |
| 7  | MATR |
| 8  | MATR |
| 9  | MATR |
| 10 | MATR |
| 11 | MATR |
| 12 | MATR |
| 13 | MATP |
| 14 | MATP |
| 15 | MATP |
| 16 | MATP |
| 17 | MATP |
| 18 | MATL |
| 19 | MATL |
| 20 | MATL |
| 21 | MATL |
| 22 | MATR |
| 23 | MATR |
| 24 | MATR |
| 25 | MATP |

**Fig. 30.** Simple detail CMCV visualisation of *Hammerhead\_HH9*, showing model nodes, labeled with node type and index, arranged according to guide tree - Part 1

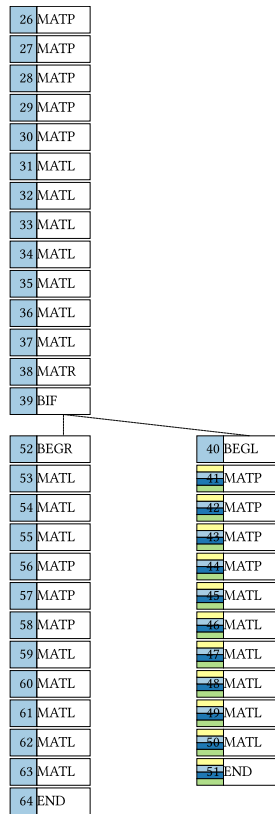

**Fig. 31.** Simple detail CMCV visualisation of *Hammerhead\_HH9*, showing model nodes, labeled with node type and index, arranged according to guide tree - Part 2

# Hammerhead\_HH9 ■

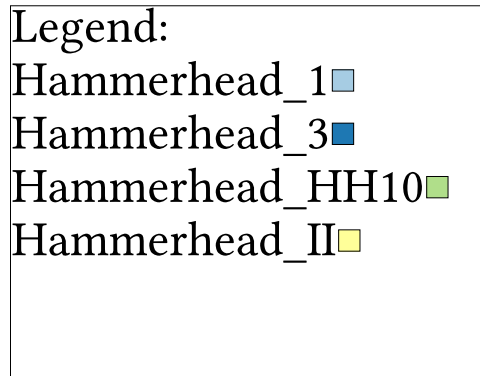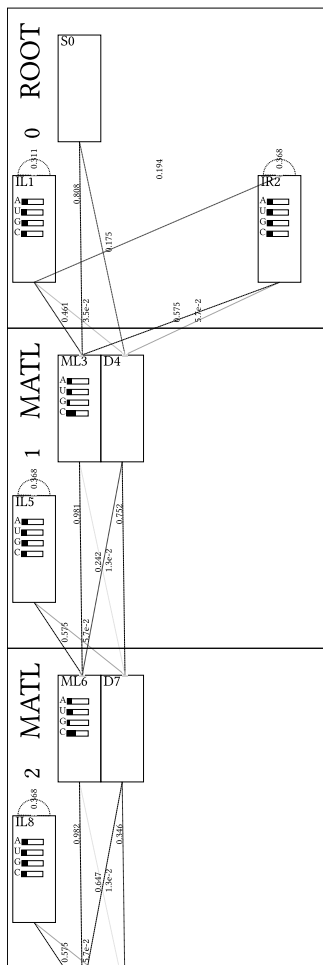

**Fig. 32.** Detailed CMCV visualisation of *Hammerhead\_HH9*, showing nodes with states, emission and transition probabilities, arranged according to guide tree. Transitions below threshold that can be set via option are not shown and line strength corresponds to probability. Linked are nodes highlighted by color which correspond to the clan families in the automatically created legend - Part1.

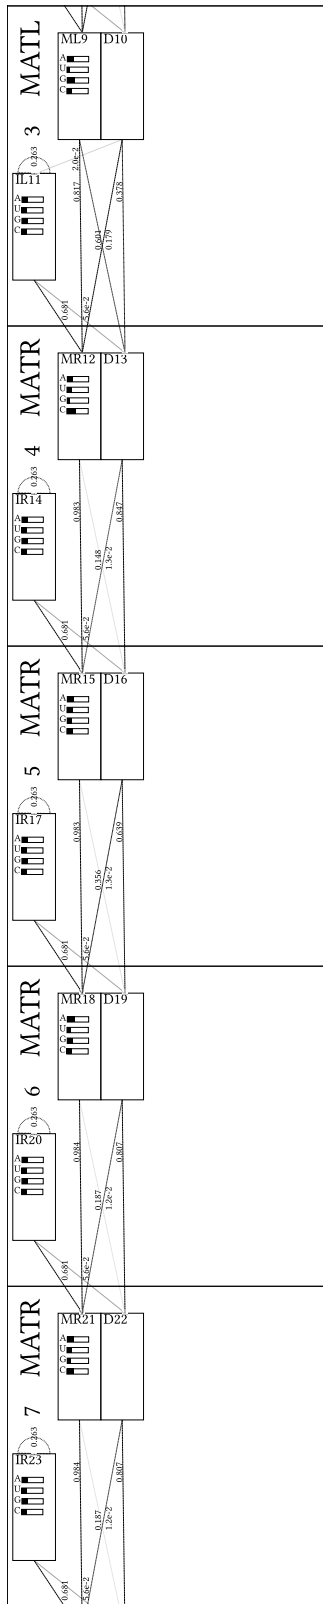

**Fig. 33.** Detailed CMCV visualisation of *Hammerhead\_HH9*, showing nodes with states, emission and transition probabilities, arranged according to guide tree. Transitions below threshold that can be set via option are not shown and line strength corresponds to probability. Linked are nodes highlighted by color which correspond to the clan families in the automatically created legend - Part2.

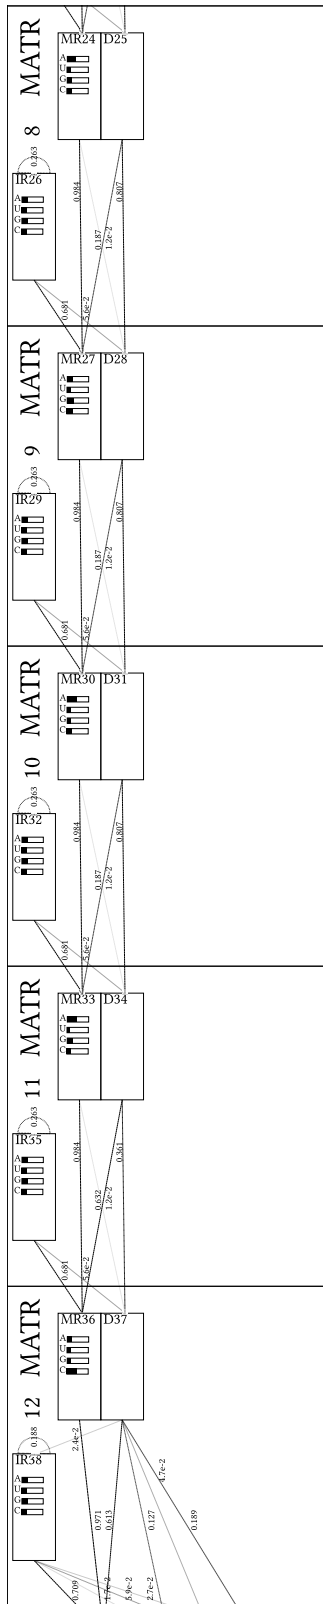

**Fig. 34.** Detailed CMCV visualisation of *Hammerhead\_HH9*, showing nodes with states, emission and transition probabilities, arranged according to guide tree. Transitions below threshold that can be set via option are not shown and line strength corresponds to probability. Linked are nodes highlighted by color which correspond to the clan families in the automatically created legend - Part3.



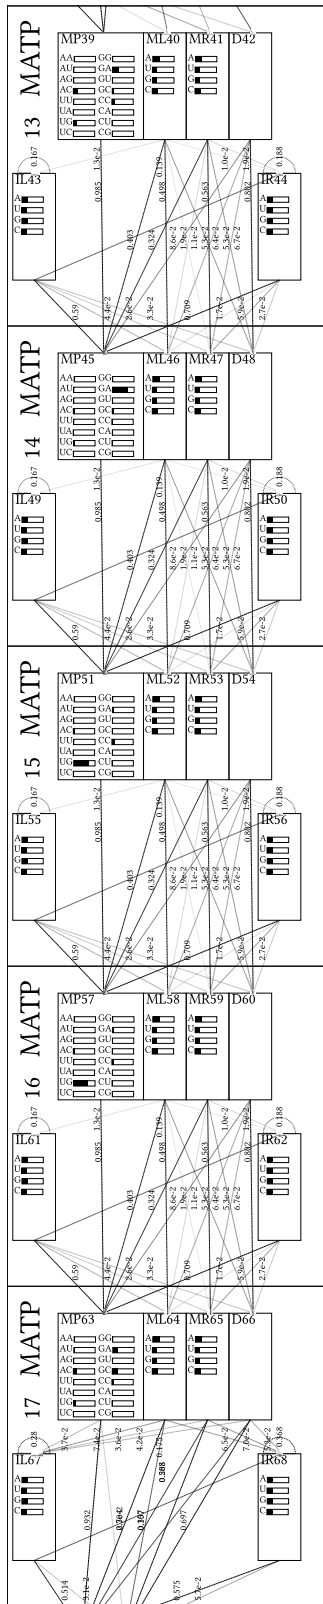

**Fig. 35.** Detailed CMCV visualisation of *Hammerhead\_HH9*, showing nodes with states, emission and transition probabilities, arranged according to guide tree. Transitions below threshold that can be set via option are not shown and line strength corresponds to probability. Linked are nodes highlighted by color which correspond to the clan families in the automatically created legend - Part4.

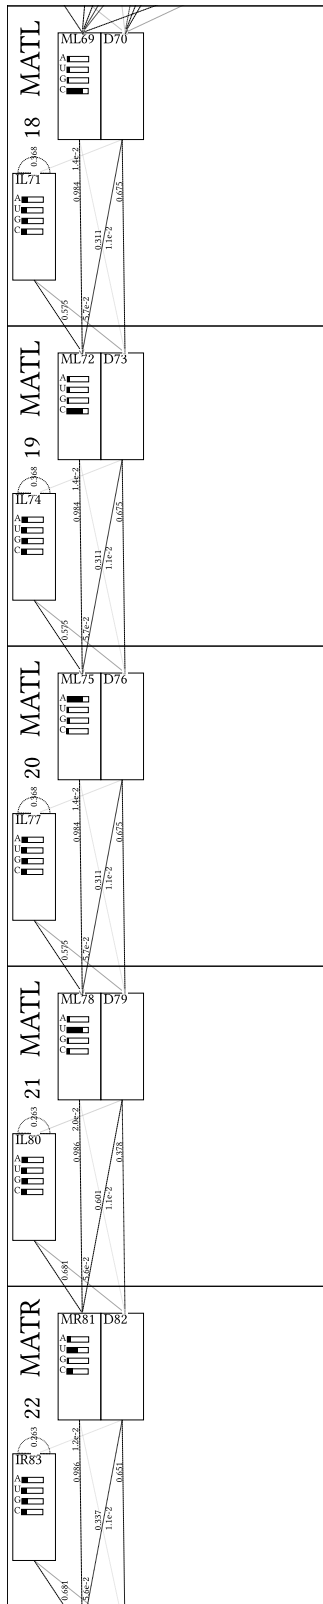

**Fig. 36.** Detailed CMCV visualisation of *Hammerhead\_HH9*, showing nodes with states, emission and transition probabilities, arranged according to guide tree. Transitions below threshold that can be set via option are not shown and line strength corresponds to probability. Linked are nodes highlighted by color which correspond to the clan families in the automatically created legend - Part5.

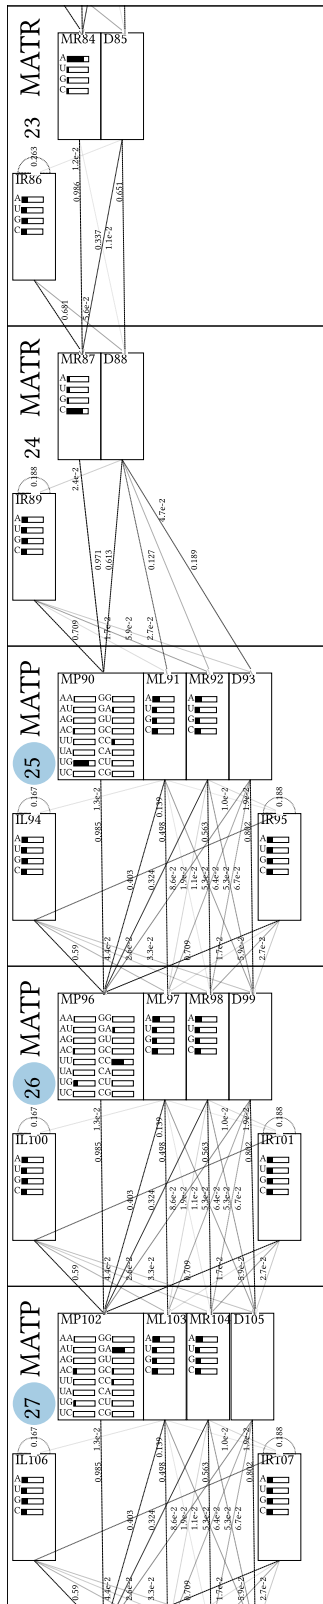

**Fig. 37.** Detailed CMCV visualisation of *Hammerhead\_HH9*, showing nodes with states, emission and transition probabilities, arranged according to guide tree. Transitions below threshold that can be set via option are not shown and line strength corresponds to probability. Linked are nodes highlighted by color which correspond to the clan families in the automatically created legend - Part6.

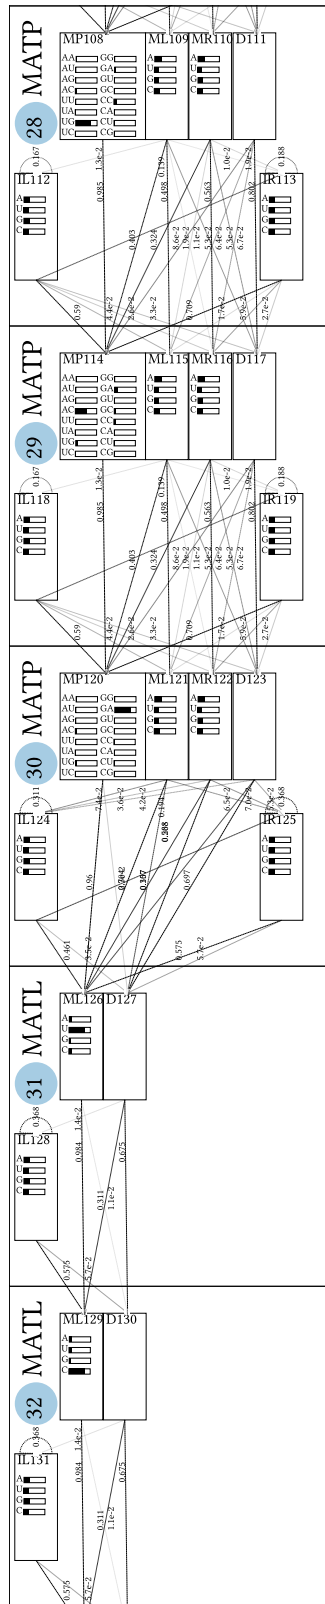

**Fig. 38.** Detailed CMCV visualisation of *Hammerhead\_HH9*, showing nodes with states, emission and transition probabilities, arranged according to guide tree. Transitions below threshold that can be set via option are not shown and line strength corresponds to probability. Linked are nodes highlighted by color which correspond to the clan families in the automatically created legend - Part7.

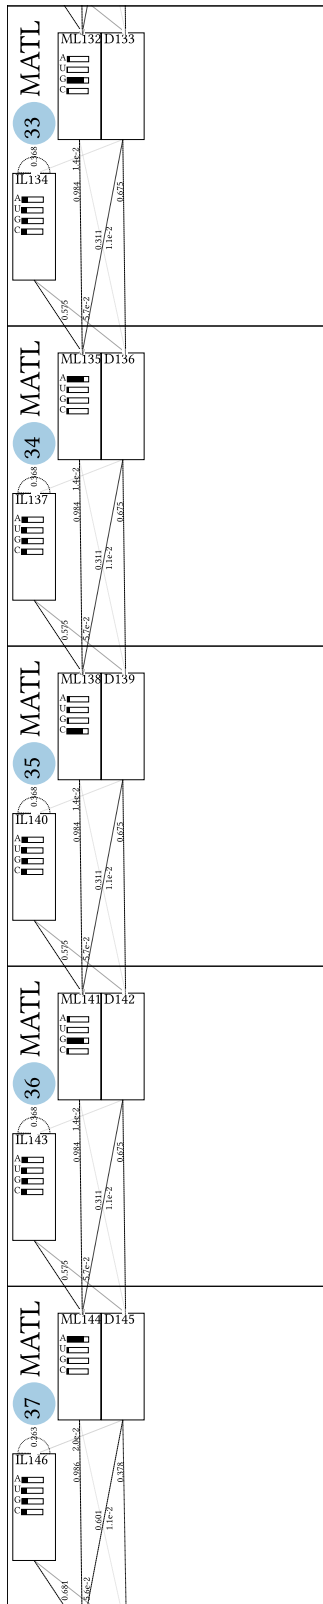

**Fig. 39.** Detailed CMCV visualisation of *Hammerhead\_HH9*, showing nodes with states, emission and transition probabilities, arranged according to guide tree. Transitions below threshold that can be set via option are not shown and line strength corresponds to probability. Linked are nodes highlighted by color which correspond to the clan families in the automatically created legend - Part 8.

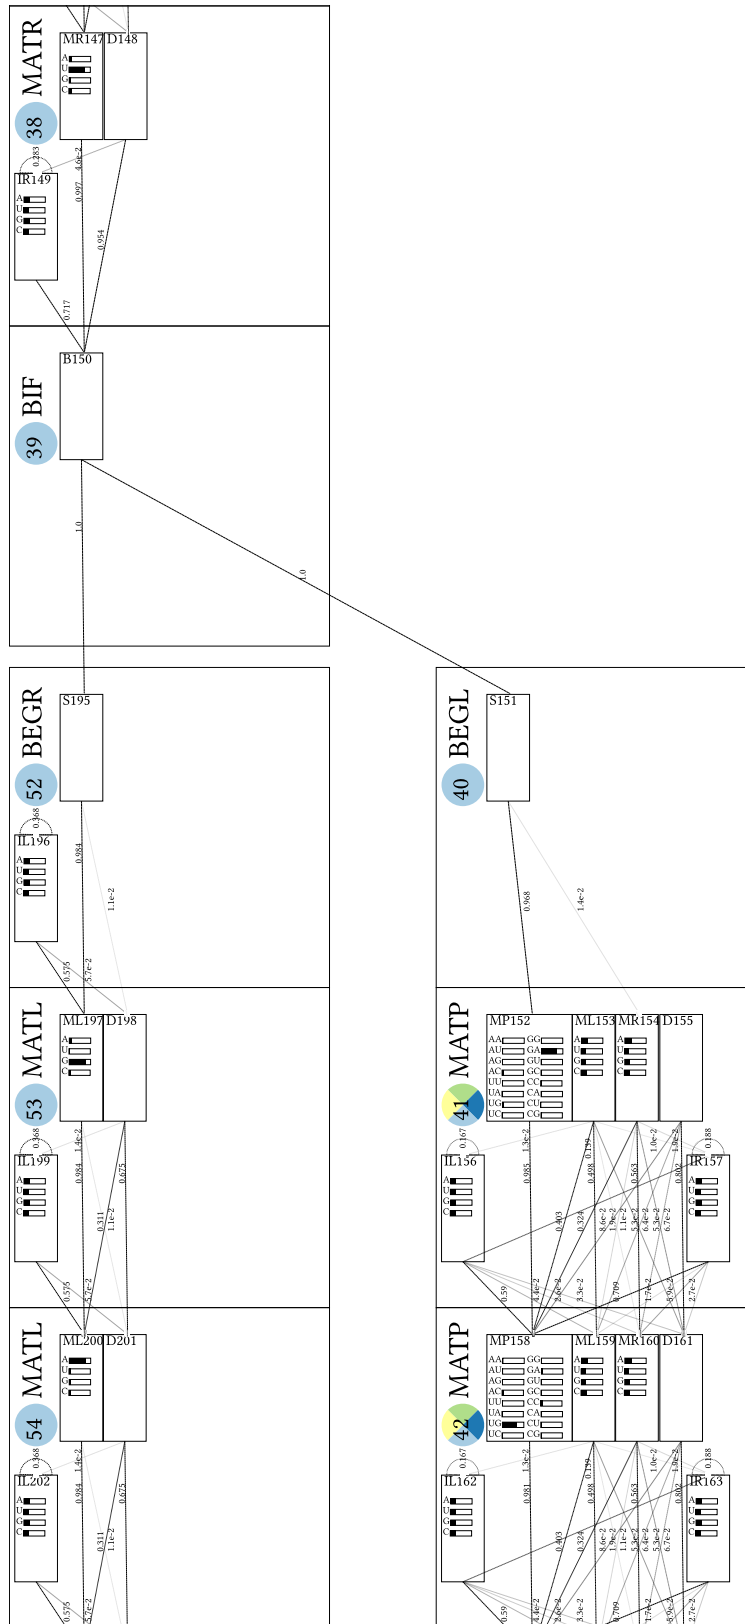

**Fig. 40.** Detailed CMCV visualisation of *Hammerhead\_HH9*, showing nodes with states, emission and transition probabilities, arranged according to guide tree. Transitions below threshold that can be set via option are not shown and line strength corresponds to probability. Linked are nodes highlighted by color which correspond to the clan families in the automatically created legend - Part9.

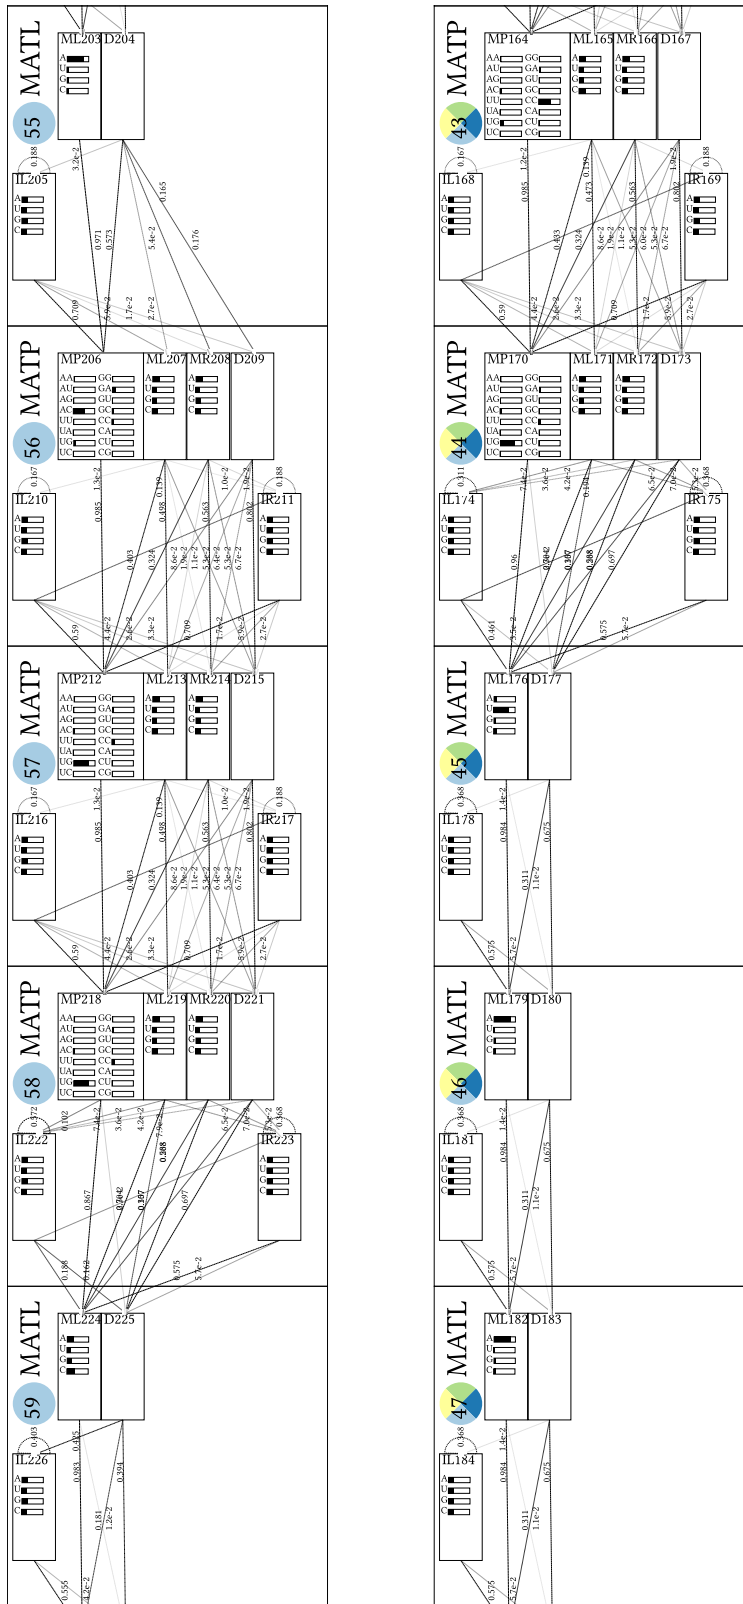

**Fig. 41.** Detailed CMCV visualisation of *Hammerhead\_HH9*, showing nodes with states, emission and transition probabilities, arranged according to guide tree. Transitions below threshold that can be set via option are not shown and line strength corresponds to probability. Linked are nodes highlighted by color which correspond to the clan families in the automatically created legend - Part10.

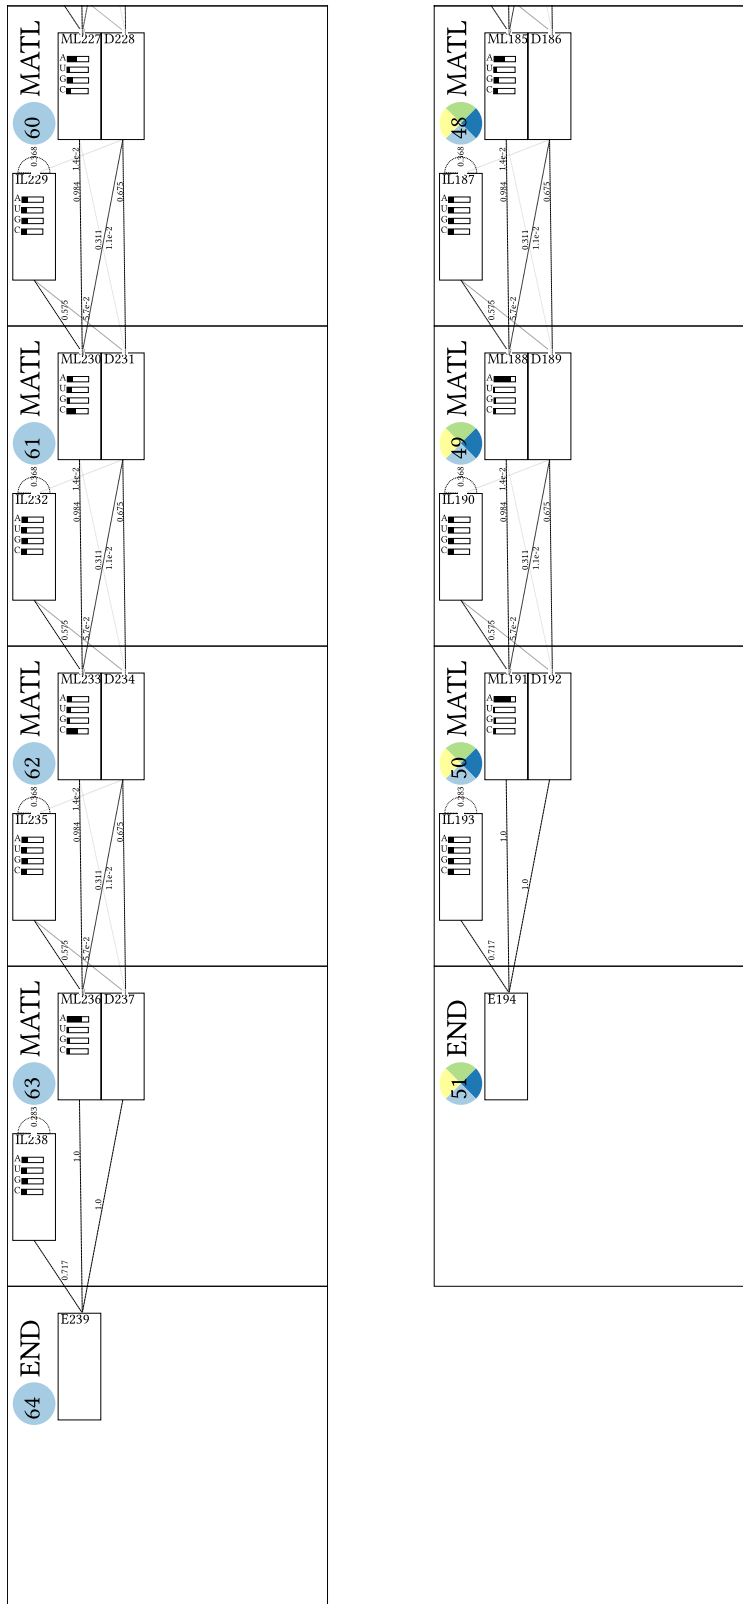

**Fig. 42.** Detailed CMCV visualisation of *Hammerhead\_HH9*, showing nodes with states, emission and transition probabilities, arranged according to guide tree. Transitions below threshold that can be set via option are not shown and line strength corresponds to probability. Linked are nodes highlighted by color which correspond to the clan families in the automatically created legend - Part11.



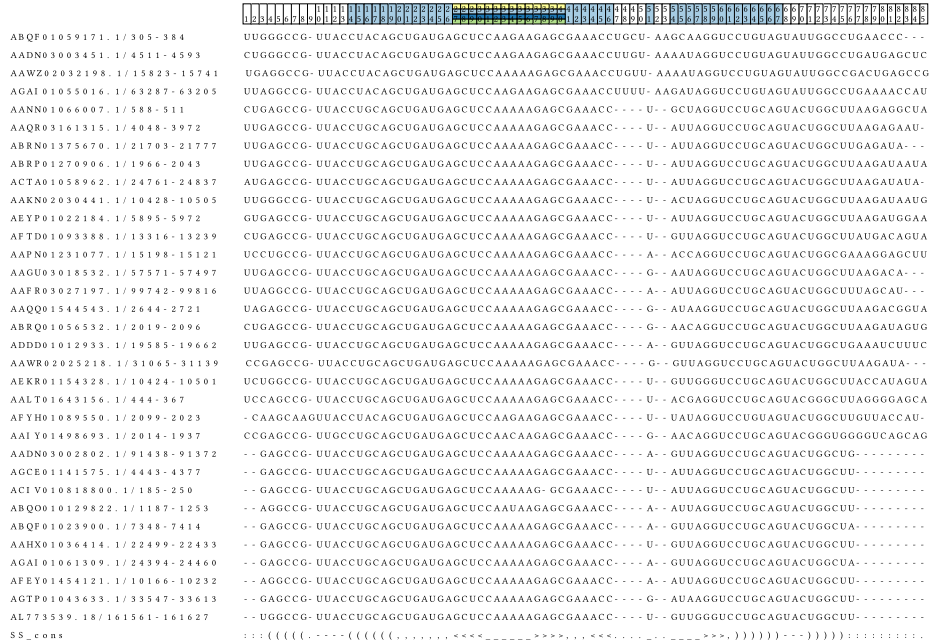

**Fig. 43.** Hammerhead\_HH9 Rfam family alignment visualisation, the number of alignment entries can be set via option. The displayed column indices allow association with the corresponding nodes in the model. The consensus secondary structure is shown in the last line.

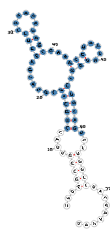

**Fig. 44.** Consensus secondary structure visualisation for Hammerhead HH9 with forna. Nucleotides linked to Hammerhead.1 family are highlighted by color.

Hammerhead\_HH9

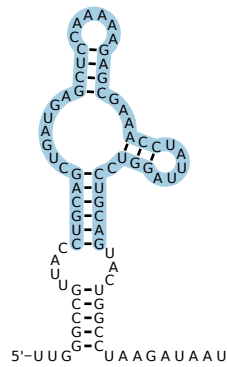

**Fig. 45.** Consensus secondary structure visualisation for Hammerhead HH9 with R2R. Nucleotides linked to Hammerhead\_1 family are highlighted by color.

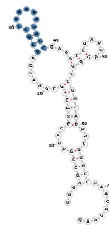

**Fig. 46.** Consensus secondary structure visualisation for Hammerhead HH9 with forna. Nucleotides linked to Hammerhead\_3 family are highlighted by color.

Hammerhead\_HH9

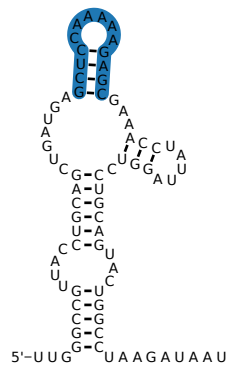

**Fig. 47.** Consensus secondary structure visualisation for Hammerhead HH9 with R2R. Nucleotides linked to Hammerhead\_3 family are highlighted by color.

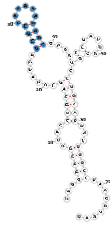

**Fig. 48.** Consensus secondary structure visualisation for Hammerhead HH9 with forna. Nucleotides linked to Hammerhead HH10 family are highlighted by color.

Hammerhead\_HH9

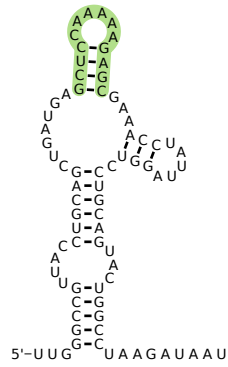

**Fig. 49.** Consensus secondary structure visualisation for Hammerhead HH9 with R2R. Nucleotides linked to Hammerhead HH10 family are highlighted by color.
